# 1 Mathematically mapping the network of 2 cells in the tumor microenvironment

3 Mike van Santvoort<sup>1,2</sup>, Óscar Lapuente-Santana<sup>2,3</sup>, Francesca Finotello<sup>4</sup>, Pim van der  
4 Hoorn<sup>1,2,†</sup>, Federica Eduati<sup>2,3,†</sup>

5  
6 1 Department of Mathematics and Computer Science, Eindhoven University of Technology,  
7 Eindhoven, PO Box 513, 5600MB, Eindhoven, The Netherlands.

8 2. Institute for Complex Molecular Systems, Eindhoven University of Technology, PO Box 513,  
9 5600MB, Eindhoven, The Netherlands.

10 3 Department of Biomedical Engineering, Eindhoven University of Technology, PO Box 513,  
11 5600MB, Eindhoven, The Netherlands.

12 4 Universität Innsbruck, Department of Molecular Biology, Digital Science Center (DiSC),  
13 Innrain 52, 6020 Innsbruck, Austria

14 †Co-corresponding authors: Pim van der Hoorn [w.l.f.v.d.hoorn@tue.nl](mailto:w.l.f.v.d.hoorn@tue.nl), Federica Eduati  
15 [f.eduati@tue.nl](mailto:f.eduati@tue.nl)

## 16 **Abstract**

17 Cell-cell interaction networks are pivotal in cancer development and treatment response.  
18 These networks can be inferred from data; however, this process often combines data from  
19 multiple patients, and/or creates networks on a cell-types level. It creates a good average  
20 overview of cell-cell interaction networks but fails to capture patient heterogeneity and/or  
21 masks potentially relevant local network structures. We propose a mathematical model based  
22 on random graphs (called RaCInG) to alleviate these issues using prior knowledge on potential  
23 cellular interactions and patient's bulk RNA-seq data. We have applied RaCInG to extract 444  
24 network features related to the tumor microenvironment, unveiled associations with immune  
25 response and subtypes, and identified cancer-type specific differences in inter-cellular  
26 signaling. Additionally, we have used RaCInG to explain how immune phenotypes regulated  
27 by context-specific intercellular communication affect immunotherapy response. RaCInG is a  
28 modular pipeline, and we envision its application for cell-cell interaction reconstruction in  
29 different contexts.

## 30 Introduction

31 In the fight against cancer, it is key to stratify patients based on tumor characteristics, since  
32 these predict how a patient will respond to treatment. To stratify effectively, one needs to  
33 measure the functional state of the cells and molecules that reside in a tumor, collectively  
34 called the tumor microenvironment (TME). Big breakthroughs have been achieved focusing  
35 on the functionality of individual cells and proteins. For example, the development of  
36 programmed cell death ligand 1 (PD-L1) blockers<sup>1</sup> to counteract the protein's unambiguous  
37 pro-tumor effect<sup>2</sup>.

38 However, the TME exhibits emergent behavior that cannot be explained by individual cell- or  
39 protein types<sup>3,4</sup> and focusing only on individual parts of the TME hinders the development of  
40 more comprehensive treatment strategies. For example, the tumor necrosis factor alpha (TNF-  
41  $\alpha$ ) protein can elicit both a pro- or anti-tumor reaction based on further context cues in the  
42 TME<sup>5</sup>. Thus, to fully capture the functional state of the TME it should be considered as an  
43 interconnected system rather than a collection of individual components.

44 An unbiased approach to do this consists in the modeling of the TME as a cell-cell  
45 communication network, which can be inferred typically from RNA sequencing (RNAseq) data  
46 using statistical inference methods or machine learning techniques<sup>6</sup>. Several studies have  
47 shown the value of using the reconstructed cell-cell communication networks to study the role  
48 of cell-cell communication in the TME<sup>7-12</sup>. However, existing techniques have several  
49 drawbacks. Most of them build a network on the cell- and protein-type level and not on the  
50 level of individual cells/proteins<sup>6-9</sup>. This creates a “low resolution picture” of the cell-cell  
51 communication network that masks important local network structures. Moreover, these  
52 methods are often do not capture cell-cell communication networks of individual patients<sup>11,13</sup>.

53 Most of the methods that construct networks of individual cells or individual patients rely on  
54 single-cell RNA-sequencing (scRNA-seq) data to derive their networks<sup>9,12</sup>. This provides  
55 “higher resolution” modeling, but is more complicated to apply in specific use cases, since  
56 scRNA-seq data itself has some technical limitations: higher uncertainty, drop-outs, and  
57 limited clinical applicability due to its higher costs and difficulties in sample preparation<sup>14</sup>. A  
58 recent approach has been proposed that combines bulk RNA-seq data with probabilistic  
59 techniques to reconstruct cell-cell interaction networks for individual patients<sup>10</sup>. However, this  
60 method builds a network on the level of cell-types that provides only a mean-field  
61 approximation to the actual cell-cell interaction network without mathematical guarantees on  
62 how well this approximation fits the data.

63 The field of random graphs models<sup>15</sup> can help in addressing these limitations, providing natural  
64 ways to deal with limited prior knowledge when constructing cell-cell interaction networks.  
65 Where prior knowledge fails us, stochasticity of random graphs can fill the knowledge gaps in  
66 the most unbiased way possible, ensuring the result has no statistical bias outside the  
67 provided data. Although these models explicitly introduce noise in the cell-cell interaction  
68 network construction, emergent network behavior remains statistically consistent. These  
69 consistencies can be mathematically proven, extracted and used as fingerprints of the actual  
70 cell-cell interaction network. We can then use these fingerprints as features to understand,  
71 predict and ultimately reshape the TME. Thus, even if we cannot derive a cell-cell  
72 communication network at the level of individual cells directly from available data, random  
73 graph modeling will still allow us to pinpoint local properties that should emerge from such  
74 “high resolution” networks. In practice, this means random graph modeling allows us to  
75 reconstruct single cell networks from widely accessible bulk RNA-seq data. It can do this by  
76 relying on prior knowledge until uncertainties are encountered, which it resolves by sampling  
77 from all possible options uniformly at random without making extra explicit assumptions<sup>16</sup>.

78 Here, we provide a methodological pipeline to reconstruct (ensembles of) cell-cell interaction  
79 networks using patient-specific bulk RNA-seq data and prior knowledge on the ligands and  
80 receptors that can be secreted by given cell-types as input. We make use of a specifically  
81 designed random graph model as a statistical model for the potential configurations of the  
82 network that respects constraints from the input data and biology. We provide this data  
83 analysis pipeline as a general toolbox called the “Random Cell-cell Interaction Generator”  
84 (RaCInG) to study context-specific cell-cell interaction networks. To validate the pipeline, we  
85 reconstruct cell-cell interactions among relevant cell-types in the TME for 3310 cancer  
86 patients. In these case studies we show that we can extract consistent properties from  
87 individual patients that form predictors for their immune subtype and response to  
88 immunotherapy with immune checkpoint blockers (ICB).

## 89 Results

### 90 Reconstructing cell-cell communication networks through monte-carlo 91 simulations

92 RaCInG constructs directed networks where the nodes represent individual cells, and the arcs  
93 (i.e., the directed connections) represent ligand-receptor interactions between two cells. To  
94 generate networks, four types of input are needed (**Fig. 1A**): 1. A cell-type vector (*C-*  
95 *distribution*), where each entry indicates the probability of an individual cell having a given  
96 type. 2. A ligand by receptor matrix (*LR-distribution*), where each entry indicates the probability

97 of an individual interaction involving a given ligand and receptor. 3 and 4. A ligand (or receptor)  
 98 by cell-type binary matrix, where 0 indicates that a ligand (or receptor) cannot be expressed  
 99 by a cell-type, and 1 indicates that it can. An example of how these input matrices can be  
 100 derived from patient-specific bulk RNA-seq data and general prior knowledge is provided later  
 101 in the case study.

102 The network generation procedure (**Fig. 1B**) starts by generating a fixed number of individual  
 103 cells whose types are assigned randomly based on the *C-distribution*. Then, a fixed number  
 104 of random ligand-receptor interactions are generated based on the *LR-distribution*. Treating  
 105 the C- and LR-distributions as probabilities rather than as exact numbers allows handling  
 106 uncertainties in the input data.

107 The procedure continues by attaching each ligand-receptor interaction as an arc in between  
 108 two cells selected uniformly at random among the ones which can express the ligand and the  
 109 receptor as defined through the *L-matrix* and *R-matrix*, respectively. This process of  
 110 connecting cell-cell pairs based on ligand and receptors continues until all ligand-receptor  
 111 pairs have been assigned.

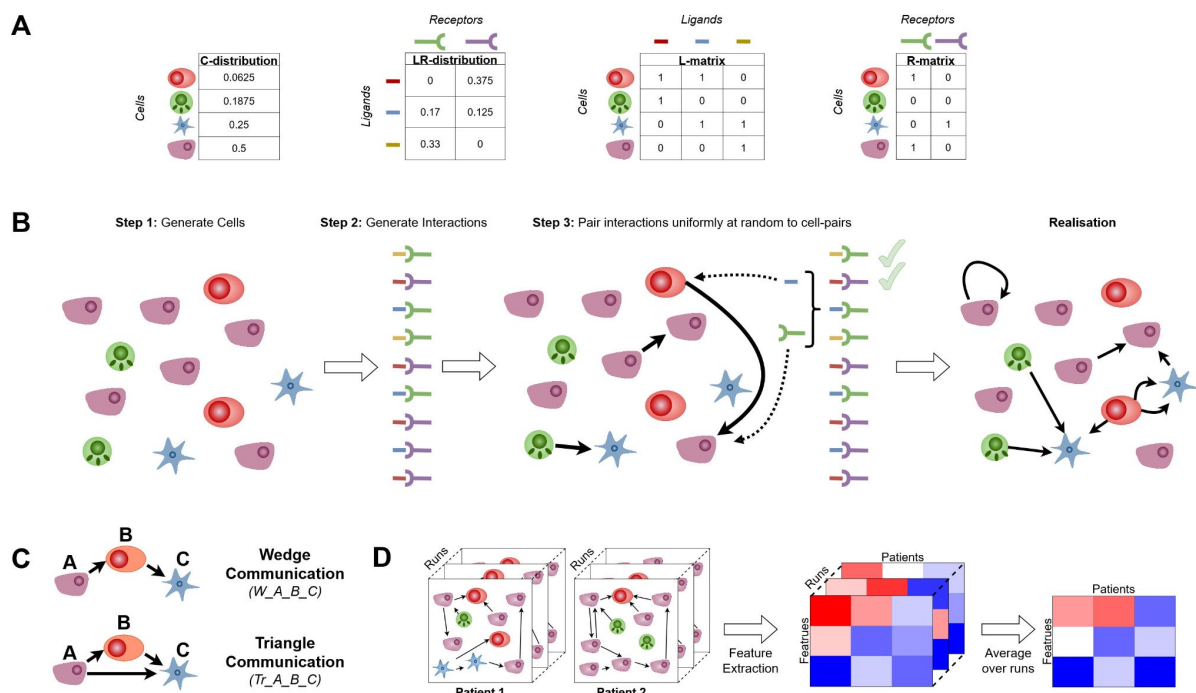

112 **Fig. 1: Methodology of monte-carlo simulation.** (A) Input matrices used by RaCInG including information on:  
 113 cell-types and ligand-receptors relative quantification (*C-distribution* and *LR-distribution* respectively); which  
 114 ligands and receptors can be expressed by specific cell types (*L-matrix* and *R-matrix* respectively). (B) Schematic  
 115 depiction of the simulation steps for one network based on the input matrices including: random generation of cells  
 116 and ligand-receptor interactions based on *C-distribution* and *LR-distribution* matrices respectively (Step 1-2);  
 117 iterative assignment of ligand-receptor interactions to cell-pairs based on *L-matrix* and *R-matrix* (Step 3). (C) The  
 118 types of features extracted from the simulated networks. (D) The global pipeline of the monte-carlo method  
 119 including the generation of multiple possible realizations of random networks and the extraction of robust network  
 120 features.  
 121

122 After this procedure, RaCInG has created one network instance for a given patient that  
123 adheres to the constraints from RNA-seq data. This is only one possible representation of the  
124 network and is not necessarily representative of the patient's actual cell-cell communication  
125 network. Thus, RaCInG generates an ensemble of networks for the same patient and extracts  
126 statistical properties that remain consistent in the network ensemble<sup>17</sup>. We define these as  
127 network fingerprints which include information about high-level interactions between two or  
128 more cell-types (graphlets) and about low-level interactions between ligands and receptors.

129 Currently, two types of fingerprints involving triplets of cells are extracted based on monte-  
130 carlo simulations by RaCInG: wedges and triangles (**Fig. 1C**). Specific wedges and triangles  
131 are referred to hereafter as  $W_{A\_B\_C}$  and  $Tr_{A\_B\_C}$ , respectively, with letters indicating the  
132 cell types involved. The count of wedges and triangles for individual patient-specific networks  
133 is computed as the average over the ensemble to account for model randomness and derive  
134 close approximation of their abundance in the actual cell-cell communication network (**Fig.**  
135 **1D**, see **Methods** for the computation of the counts). The quantification of network fingerprints  
136 for individual patients are interpreted as features for further analysis.

### 137 Kernel-based approach to derive network fingerprints

138 Although monte-carlo simulation provides an intuitive method to extract features, RaCInG also  
139 allows to mathematically derive some features using random graph theory, based on kernels.  
140 This is a matrix that encodes the asymptotic probability that a ligand-receptor interaction exists  
141 between two individual cells with specific cell-types. It is based on the expected number of  
142 ligand-receptor interactions that connect these cells<sup>15,18–20</sup> (see **Methods** for the exact  
143 expression). If we would generate networks using a kernel, then after generation of cells a  
144 coin flip determines whether a ligand-receptor interaction between each pair of individual cells  
145 appears. The success probability of this flip is determined by the cell-types of the pair and their  
146 kernel value (**Fig. 2A**).

147 RaCInG allows quantifying the direct communication between individual cells with cell-type A  
148 and B (referred hereafter as  $Dir_{A\_B}$ , **Fig. 2B**) using the kernel method. First the kernel is  
149 computed for each patient using all four input matrices, and then the kernels are transformed  
150 into the feature values (**Fig. 2C**). This approach uses a mathematical guarantee (see **Methods**  
151 for the derivation) and is faster than using the network generation procedure.

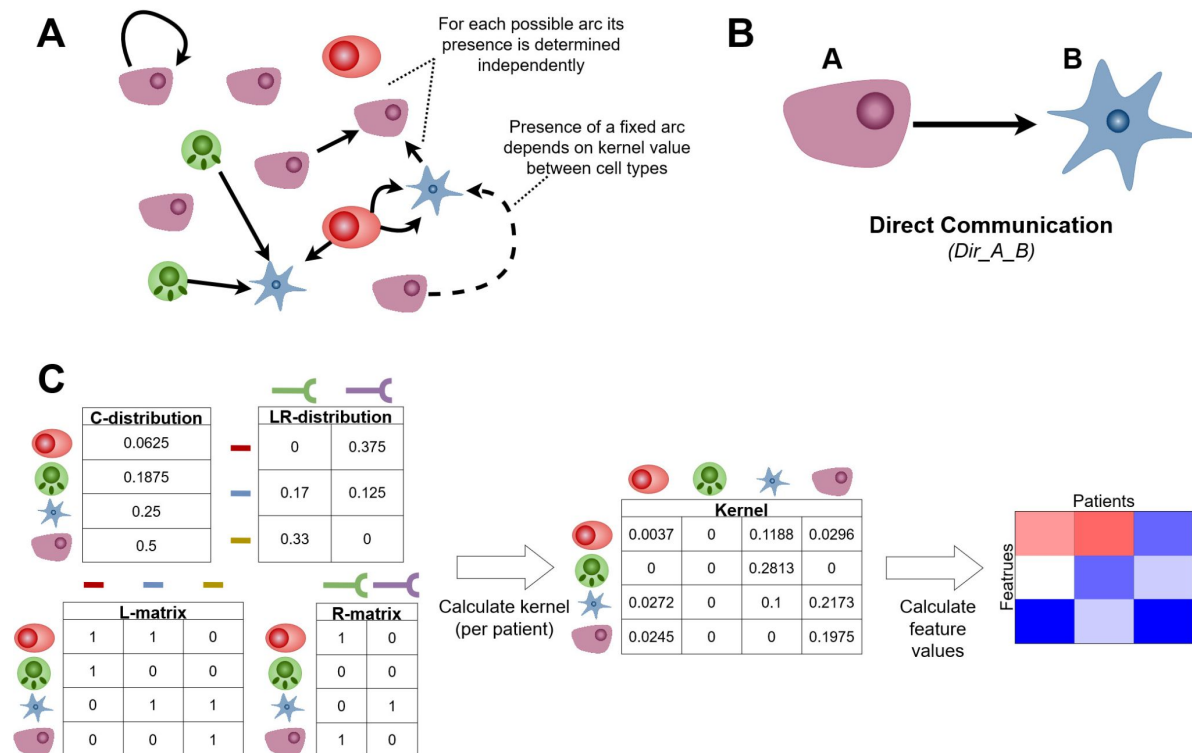

152  
153 **Fig. 2: Kernel method based on random graph theory.** (A) The mathematical idea behind graph generation in  
154 the kernel method, which highlights the interpretation of the kernel. (B) The feature type extracted using the kernel  
155 method. (C) The general pipeline used to extract features from the graph using the kernel method.  
156

## 157 Normalization of network fingerprints to account for different 158 cellular composition

159 All methodologies in RaCInG to extract network features (i.e., the monte-carlo and kernel  
160 method) are biased through cell-type quantification. When assigning ligand-receptor pairs to  
161 cells, the model selects cells uniformly at random, so highly abundant cells-types have a larger  
162 probability of being selected, reflecting in the feature values. To account for this and allow  
163 comparison of network features between samples with different cellular composition, we  
164 implement a normalization procedure that corrects for the influence of the cell-type  
165 abundance.

166 RaCInG recomputes the network features for each patient using the same input matrices  
167 except for the *LR-distribution*, which is made uniform (i.e., same probability for all ligand-  
168 receptor interactions). This removes the influence of the ligand-receptor quantification, as the  
169 features extracted using the uniform *LR-distribution* are determined just by cell-type  
170 quantification. Finally, we compute the fold-change between the (average) feature values  
171 obtained using the data-derived versus uniform *LR-distributions*. The resulting feature values  
172 depend predominantly on ligand-receptor quantification. Moreover, the procedure ensures  
173 that all feature values have the same order of magnitude, regardless of their type.

## 174 Application to characterize the tumor microenvironment

175 We used RaCInG to investigate the role of cell-cell communication by building patient-specific  
176 cell-cell interaction network models for 3213 patients from six solid cancers from The Cancer  
177 Genome Atlas (TCGA): bladder urothelial carcinoma (BLCA; N = 407), colon rectal cancer  
178 (CRC; N = 379), clear cell renal cell carcinoma (KIRC; N = 533), non-small cell lung cancer  
179 (NSCLC; N = 1012), skin cutaneous melanoma (SKCM; N = 467) and stomach  
180 adenocarcinoma (STAD; N = 415) (**Methods**)<sup>21</sup>.

181 We first derived the four input matrices required by RaCInG as follows (**Fig. 3A**; see **Methods**  
182 for more details): 1. The *C-distribution* table consists of nine cell-types present in the TME  
183 (names and abbreviations are summarized in **Table 1**). The probability of each cell-type to  
184 appear in the network was defined specifically for each patient from RNA-seq data as their  
185 relative abundance quantified using an ensemble of deconvolution methods<sup>22</sup>. The *LR-*  
186 *distribution* table was defined based on a list of 971 literature-curated LR interactions<sup>23</sup> and  
187 quantified for each patient as the most limiting factor between the expression of the ligand and  
188 the receptor based on the RNA-seq data. 3-4. The *L-matrix* and the *R-matrix* were defined as  
189 (non patient-specific) prior knowledge that indicated which ligand and receptor can be  
190 expressed by a specific cell-type based on cell-type specific gene expression data<sup>24</sup>.

191 **Table 1: The cell-types included in our case studies.**

| Cell name                    | Abbreviation | Cell name         | Abbreviation |
|------------------------------|--------------|-------------------|--------------|
| Tumor                        | <i>Tumor</i> | B-cell            | <i>B</i>     |
| Cancer associated fibroblast | <i>CAF</i>   | Macrophage        | <i>M</i>     |
| Endothelial cell             | <i>Endo</i>  | Dendritic cell    | <i>DC</i>    |
| CD8+ T-cell                  | <i>CD8</i>   | Regulatory T-cell | <i>Treg</i>  |
| Natural killer cell          | <i>NK</i>    |                   |              |

192  
193 Using the monte-carlo simulations and the kernel method described above (**Fig. 1D** and **2C**)  
194 we derived the three sets of network features consisting of: 81 direct communications, 729  
195 wedge communications and 978 triangle communications (**Fig. 3B**). Based on our first  
196 analysis of the results, showing a limited influence of the directionality of interactions, we  
197 decided to consider classes of undirected interactions (**Methods**). Additionally, due to the low  
198 and inconsistent quantification of NK cells, features involving this cell-type were discarded.  
199 These adjustments reduced the number of network features to 36, 288 and 120, respectively.  
200 Finally, we used the extracted features (**Supplementary Table 1**) to compare patients or  
201 patient groups (**Fig. 3C**) and look into the LR-pairs that make up specific features of interest  
202 (**Fig. 3D**).



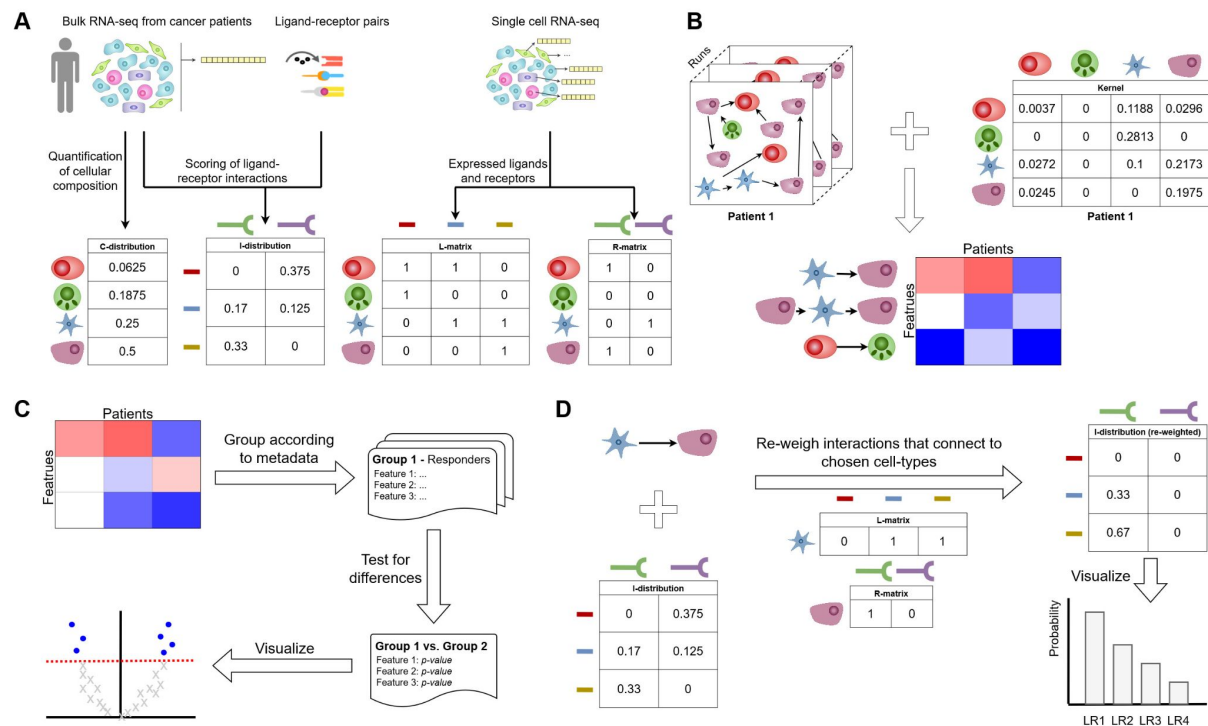

203  
204  
205  
206  
207  
208

**Fig. 3: Modular structure of RaCInG for analysis of cell-cell interactions in the TME.** (A) Cell- and interaction-quantification from bulk RNA-seq data. (B) Feature extraction from patient specific graphs or kernel values. (C) Statistical analysis based on a list of extracted feature values in a batch of patients. (D) Extraction of LR-pair probabilities for given cell-type interactions.

## 209 Network features correlate with immune response

210 Cell-cell communication has shown to influence the orchestration of anti-cancer immune  
211 response<sup>25</sup>. Therefore, we have applied RaCInG to investigate how different graph features in  
212 our models correlate with an ensemble immune response score (**Methods**)<sup>26</sup>.

213 We observed that 31-87 features out 444 (7-20% depending on cancer type) strongly  
214 correlated with immune response (absolute Spearman rho > 0.5; p-val < 0.01 after Bonferroni  
215 correction; **Fig. 4**). Generally, the more “complex” features (i.e., wedges and triangles) showed  
216 similar associations with immune response (6.6%–18.1% and 6.7%–21.7% highly correlated  
217 features respectively) as the “simple” fingerprints (i.e., direct communication; 8.3%–38.9%  
218 highly correlated features). However, if a direct communication feature appeared (e.g.  
219 *Dir\_CD8\_M* in NSCLC; rho = 0.652, p-val < 0.0001), then often a more complex feature,  
220 including this direct communication as a subset, showed a higher absolute correlation (e.g.  
221 *W\_CD8\_M\_M*; rho = 0.754, p-val < 0.0001). Such more complex features are more informative  
222 as they describe intercellular communication paths rather than simple direct interactions and  
223 they can highlight which detailed interaction elicits the strong correlation with immune  
224 response. Following the example above, *W\_CAF\_M\_CD8* has lower correlation (rho = 0.590,  
225 p-val < 0.0001) meaning that the addition of CAFs to direct communication between  
226 macrophages and T-cells worsens the overall immune response. These observations highlight

227 the importance of looking at more intricate communication mechanisms to study the  
 228 coordination of anti-cancer immune responses.

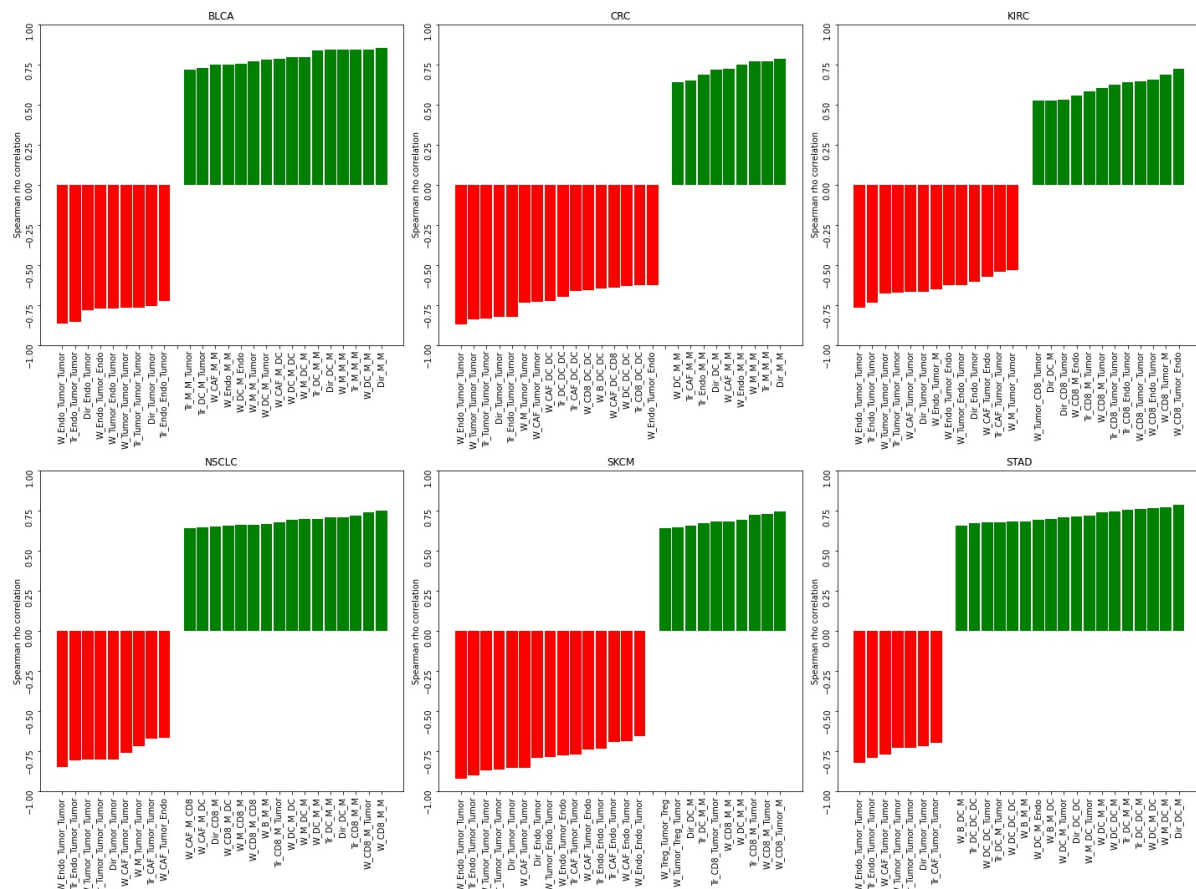

229

230 **Fig. 4: Network features associated with immune response.** The 25 features with the largest spearman rho  
 231 correlation with immune response for each of the six cancer types. Features were only selected if their associated  
 232 p-value was smaller than 0.01 after Bonferroni correction.  
 233

234 When focusing on features that showed negative association with immune response, we  
 235 mainly found communication structures consisting of tumor cells, endothelial cells and CAFs  
 236 and absence of involvement of immune cells. One reason for that is the direct positive  
 237 relationship between immune response and the presence of infiltrated immune cells in the  
 238 tumor (e.g., through the formation of tertiary lymphoid structures)<sup>27,28</sup>. In this scenario, we  
 239 expect the immune cells to drive the communication with the aforementioned three cell-types.  
 240 Instead, in tumors with a less active immune response, the main remaining communication  
 241 players will be tumor cells, CAFs and endothelial cells.

242 Interestingly, we observed a different behavior in CRC, where endothelial cell and tumor  
 243 communication as well as dendritic cell communication to CAFs and CD8+ T-cells were  
 244 negatively correlated with the immune response score (**Fig. 4**; CRC panel). This can be  
 245 explained by the fact that dendritic cells in CRC are mostly found in the tumor stroma and are

246 therefore likely to establish crosstalks with stromal cells like CAFs<sup>29</sup>. In agreement with the  
247 negative correlation, dendritic cells in the stroma have been shown to be associated with low  
248 infiltration of CD8+ T-cells<sup>29</sup>.

249 Concerning positive associations with immune response, we observed a varied palette of  
250 features, with communication predominantly between immune cells or between immune cells  
251 and tumor cells found among the features with the largest, positive correlation. The specific  
252 set of features correlated with immune response varies between cancer types, confirming the  
253 well-established heterogeneity of the TME across cancer types<sup>30</sup>. This heterogeneity underlies  
254 the potential of deriving patient-specific models of intercellular communication, as we will  
255 further explore in the next sections.

## 256 Network features as immune phenotype indicators

257 To uncover the existent heterogeneity of cell-cell communication across patients, we used  
258 RaCInG to seek whether certain network features can explain differences between immune  
259 phenotypes. We considered four immune phenotypes previously defined in literature<sup>31</sup>:  
260 immune enriched (IE), immune enriched-fibrotic (IE/F), fibrotic (F) and immune deprived (D).  
261 The immune enriched groups (IE and IE/F) are characterized by high anti-tumor immune cell  
262 infiltration and activation in the tumor. The fibrotic groups (IE/F and F) are characterized by  
263 activation of stromal cells like CAFs. IE and F tumors are expected to have positive and  
264 negative correlation with response to ICB therapy respectively. Finally, the deprived group (D)  
265 is characterized by little immune or stromal cell activation. In the following sections we start  
266 from a pan-cancer analysis of patients from the six cancer types discussed above, and then  
267 focus on two cancer-specific analyses.

### 268 Pan-cancer analysis

269 When looking at comparison between immune subtypes at the pan-cancer level (**Fig. 5**) we  
270 identified that the D phenotype is mainly characterized by communication between tumor and  
271 endothelial cells. This is in agreement with the expected negative association with the immune  
272 response. The D group is likely to have minimal leukocyte or lymphocyte activity<sup>31</sup>, opening  
273 the door for high cellular communication between malignant and non-immune cell-types.

274 As expected, we identified increased CAF activity in the fibrotic groups (IE/F and F) as well as  
275 CD8+ T-cell activity in the immune enriched groups (IE and IE/F). Interestingly, we see in the  
276 IE to F comparison that macrophages appear in both groups: communicating with CD8+ T-  
277 cells in the IE group, or with CAFs in the F group. The dual importance of macrophages in  
278 both IE and F subtypes might be explained by macrophages playing different roles in the tumor  
279 depending on their phenotype. Anti-tumor macrophages (also called M1 macrophages)

280 recruits CD8+ T-cells to fight the tumor<sup>32</sup>, explaining its appearance in the IE group where we  
 281 expect to have higher anti-tumor to pro-tumor macrophage ratio<sup>31</sup>. On the contrary, pro-tumor  
 282 macrophages (also called M2 macrophages) are known to conspire with CAFs to boost tumor  
 283 malignancy<sup>33,34</sup>, motivating why this interaction appears in the most hostile immune  
 284 phenotype. Overall, these considerations show that the network features are able to capture  
 285 general characteristics of immune phenotypes well and show potential to distinguish the  
 286 functional role of cell-types based on their interactions.

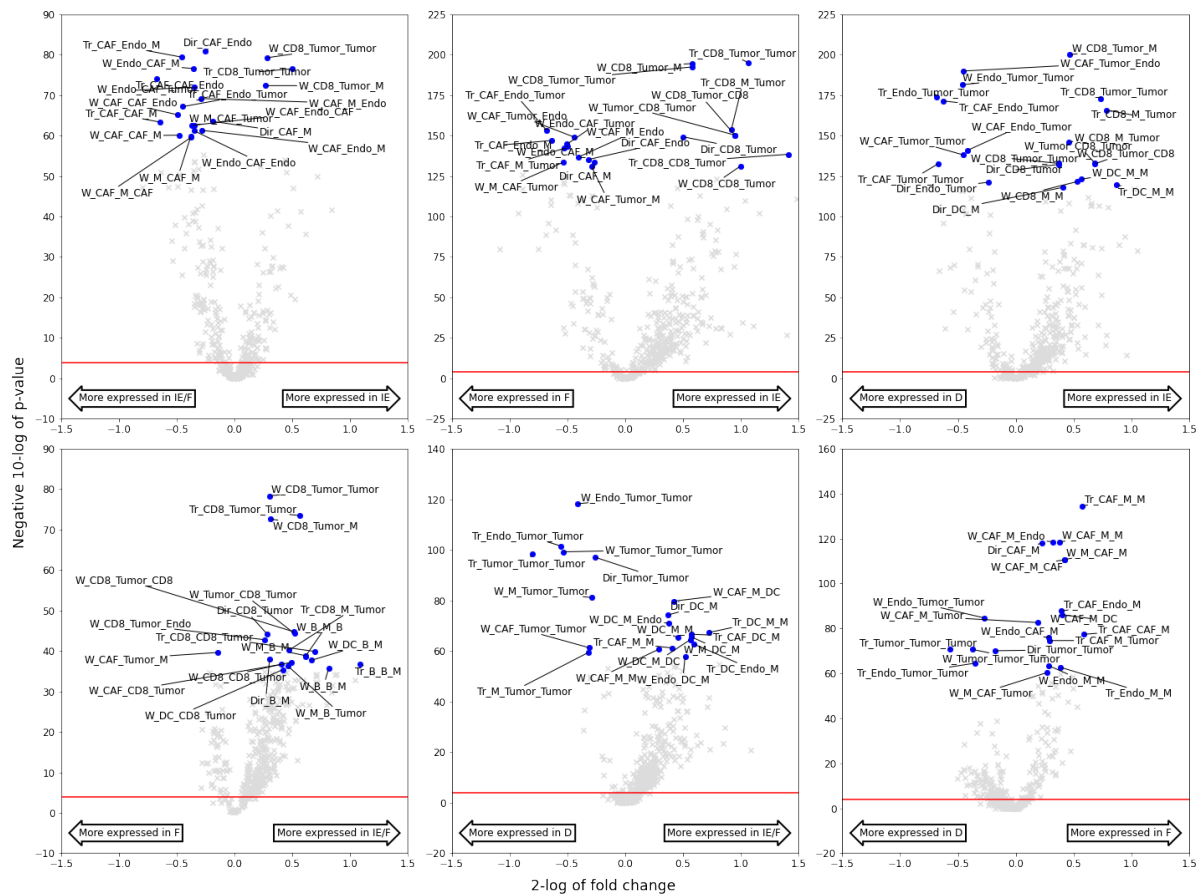

287

288 **Fig. 5: Network-based characterization of microenvironment subtypes in pan-cancer settings.** Volcano plots showing the  
 289 statistical comparison of network-based features identified by RaCInG when doing pairwise comparisons of microenvironment  
 290 subtypes across cancer types. The red line indicates the  $\alpha = 0.05$  significance threshold after Bonferroni correction. On the x-axis  
 291 we show the fold change between the average feature values for each group, and on the y-axis the negative 10-log of the  
 292 Wilcoxon rank sum test's p-value. For each plot, the twenty features with lowest p-value have been highlighted.

### 293 Cancer type-specific analysis

294 Next, we focused our analysis on melanoma (SKCM) and gastric cancer (STAD) to show  
 295 which additional insights RaCInG can provide at the cancer-specific level (**Fig. 6;**  
 296 **Supplementary Fig. 1-3**).

297 When comparing the IE versus non-IE (F and D) subtypes we observed that several features  
 298 associated with immune activation are more prominent in SKCM compared to pan-cancer

299 **(Fig. 6A)**. Examples are B-cells activating CD8+ T-cells (e.g. *Tr\_B\_CD8\_CD8*, 2-log fold-  
300 change 0.99 and 1.34 in IE vs D and IE vs F comparisons respectively), self-activation of  
301 CD8+ T-cells (e.g. *Tr\_CD8\_CD8\_CD8*, fold-change 1.66 and 1.77 in IE vs D and IE vs F  
302 comparisons respectively) and CD8+ T-cells targeting tumor cells (*Tr\_CD8\_CD8\_Tumor*, fold-  
303 change 1.40 in the IE vs D comparison). These observations are in agreement with the strong  
304 immune response reported in SKCM<sup>31</sup>. This strong antitumor immune response can cause the  
305 recruitment of immunosuppressive T<sub>reg</sub> cells by CD8+ T-cells (*Tr\_CD8\_CD8\_Treg*; fold-  
306 change 1.08 and 1.14 in IE vs D and IE vs F comparisons respectively) and B-cells  
307 (*Tr\_B\_B\_Treg*; fold-change 0.90 and 1.03 in IE vs D and IE vs F comparisons respectively)  
308 to counterbalance the high immunogenicity of these tumors and as a potential mechanism of  
309 immune evasion<sup>35-37</sup>.

310 When comparing IE and IE/F groups we observed that the CD8+ T-cell communication with  
311 endothelial cells is stronger in IE/F patients for the SKCM dataset when compared to the pan-  
312 cancer analysis (eight out of the top ten features that are more specific for SKCM involve this  
313 interaction, all with 2-log fold-change < 0; arrows pointing down in **Fig. 6A** for SKCM). Often,  
314 these features shifted from being more represented in IE patients to being enriched in IE/F  
315 patients (see e.g., *W\_CD8\_Endo\_CD8*; going from red in the pancancer to blue in the SKCM  
316 comparison of IE vs IE/F in **Fig. 6A**).

317 To delve deeper into what proteins contribute to this shift, we retrieved from RaCInG the top  
318 20 ligand-receptor interactions that are likely to drive this cell-cell communication (**Fig. 6B**).  
319 Three out of the five interactions with a higher probability of appearing in the IE/F subtype  
320 compared to the IE subtype involve a member of the family of thrombin receptors (F2R,  
321 F2RL1, and F2RL3) interacting with granzyme A (GZMA). Interestingly, GZMA interacting with  
322 thrombin receptors is usually associated with apoptosis in targeted cells<sup>3839</sup>, creating an anti-  
323 tumor microenvironment that is more fitting for the IE subtype. However, in melanoma  
324 thrombin receptors stimulation has been associated with tumor progression, which is more  
325 common in IE/F patients<sup>40</sup>.

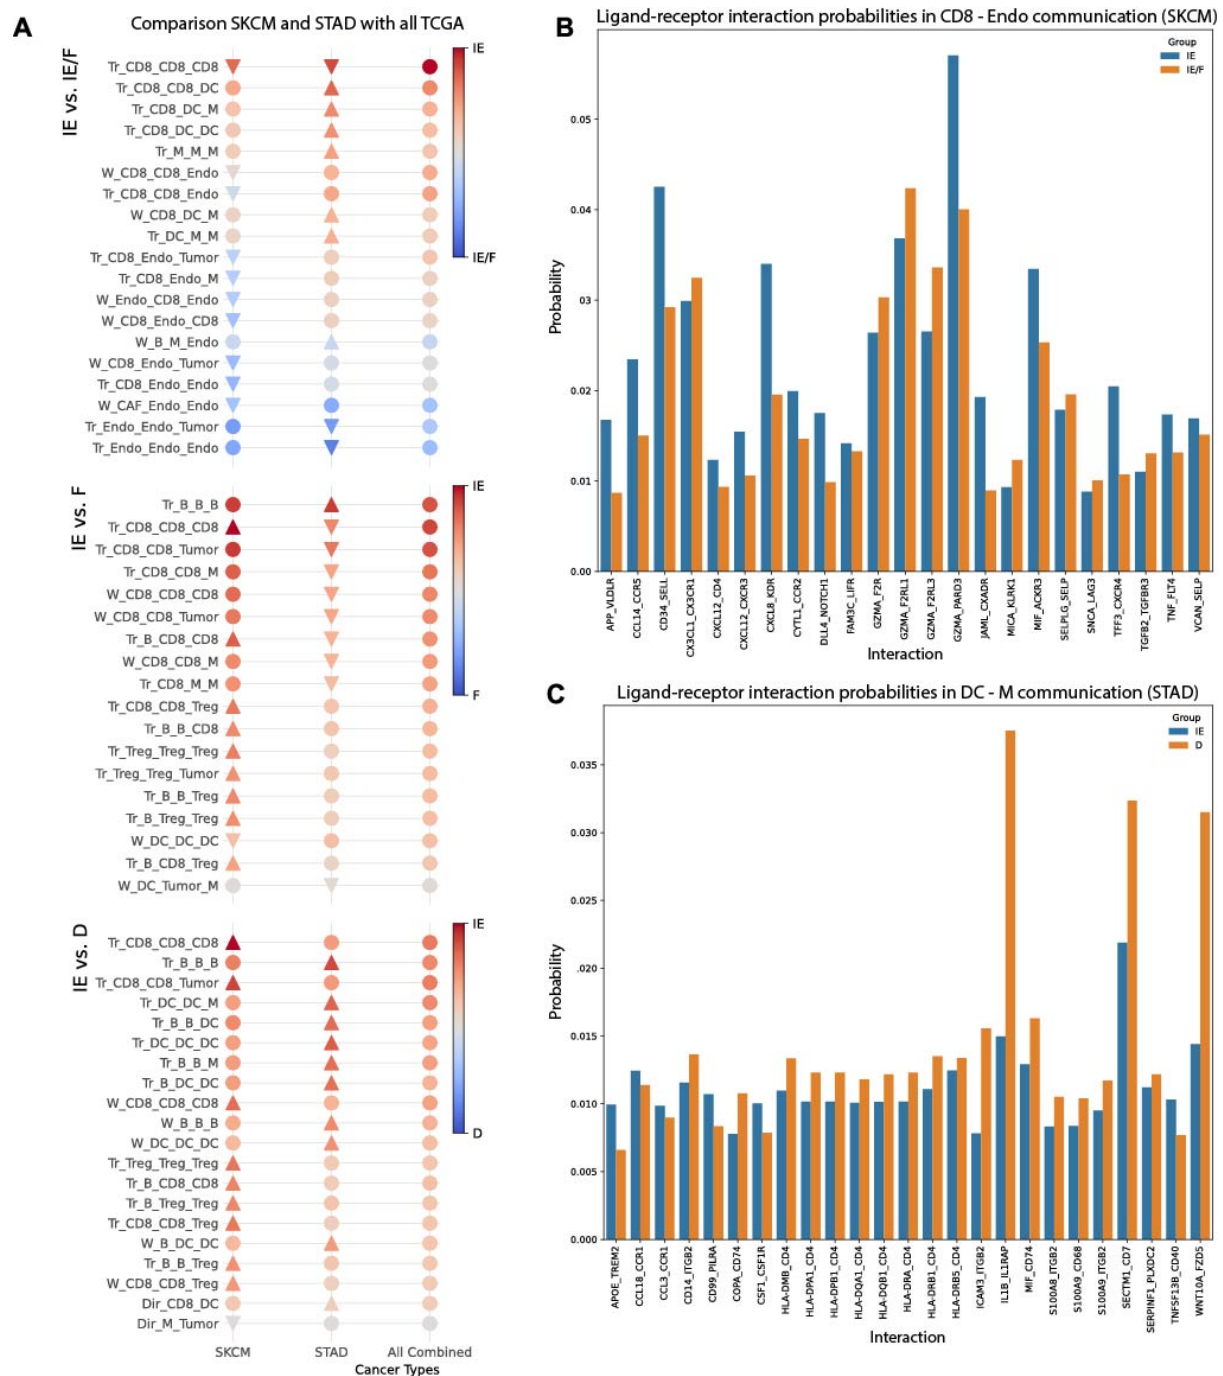

326  
327  
328  
329  
330  
331  
332  
333  
334

**Fig. 6: Cancer specific analysis of SKCM and STAD.** (A) List of top ten features for SKCM and STAD that changed the most in average fold-change when compared to the results of the pan-cancer analysis. The direction of the triangles indicates the direction of the fold-change shift when compared to the pan-cancer analysis. Dots indicate that the fingerprint is not part of the top ten features for the given cancer type. (B) The top twenty ligand-receptor pairs that are most likely to create a connection between CD8+ T-cells and endothelial cells in SKCM for the immune subtypes IE and IE/F. (C) The top twenty ligand-receptor pairs that are most likely to create a connection between dendritic cells and macrophages in STAD for the immune subtypes IE and D.

335  
336  
337  
338  
339

Regarding STAD, we observed that interactions involving dendritic cells, especially with macrophages, are the most distinguishing features which are downregulated in the D subtype compared to pan-cancer (arrows going up in the IE vs D comparison **Fig. 6A**). Focusing on the interaction between macrophages and dendritic cells, we identified three ligand-receptor pairs which are particularly more abundant in the D than in the IE subtype in STAD (**Fig. 6C**).

340 These are the interactions between interleukin 1 beta (IL1B) and interleukin-1 receptor  
341 accessory protein (IL1RAP), between WNT family member 10A (WNT10A) and frizzled class  
342 receptor 5 (FZD5), and between secreted and transmembrane protein 1 (SECTM1) and CD7.  
343 By communicating through the IL1RAP and IL1B proteins, the macrophages and dendritic  
344 cells dampen the inflammatory process in the D subtype (if they communicate), inducing a  
345 poor prognosis<sup>41</sup>. This entails that in the D subtype immune cells interact less, explaining why  
346 globally we see macrophage interaction with dendritic cells more in the IE subtype, where  
347 inflammation is stronger. Similarly, overexpression of WNT10A has been shown to induce a  
348 poor prognosis<sup>42</sup>, and is known to interact with FZD5<sup>43</sup>. Finally, there is also evidence of the  
349 secretion of SECTM1 by dendritic cells to attract monocytes to the TME via binding to CD7,  
350 promoting their differentiation into macrophages<sup>44</sup>. Taken together, pro- or anti-tumor immune  
351 infiltration through macrophage communication with dendritic cells is more likely to occur in  
352 patients from non-desert immune phenotypes<sup>31</sup>.

### 353 Network features as indicators for response to ICBs

354 As the graph features derived by RaCInG provided mechanistic understanding in terms of cell-  
355 cell communication about patients' immune phenotype, we were interested in extending the  
356 analysis into investigating patients' response to anti-PD1 immunotherapy<sup>45-47</sup> (**Methods**;  
357 **Supplementary Tables 2**).

358 First, we analyzed two melanoma datasets (Gide-Aulander cohorts<sup>45,46</sup>) with known ICB  
359 response and RNAseq data from samples collected before (n = 51) and on (n = 26) treatment.  
360 We computed the average (theoretical) kernel-values (**Methods**) for the responder and non-  
361 responder patients and used it as a measure of direct communication between cell-types in  
362 the TME (**Fig. 7A**).

363 For the responding patients in the Gide-Auslander cohorts we observed a large increase of  
364 CD8+ T-cell communication during immunotherapy (sum of the kernel values 1.4576 vs  
365 2.8788 for before and on-treatment samples, respectively). When we zoomed into the types  
366 of communication this cell-type was involved in, we observed specifically that both the amount  
367 of communication from tumor to CD8+ T cells (kernel value 0.2930 before treatment vs 0.4510  
368 on treatment) and from macrophages to T-cells (0.1558 vs 0.3170) doubled. Moreover, the  
369 amount of communication in between T-cells almost quadrupled (0.1159 vs 0.4002). Overall,  
370 this suggests an increased activation of CD8+ T cells enabled by ICB therapy.

371

372

373

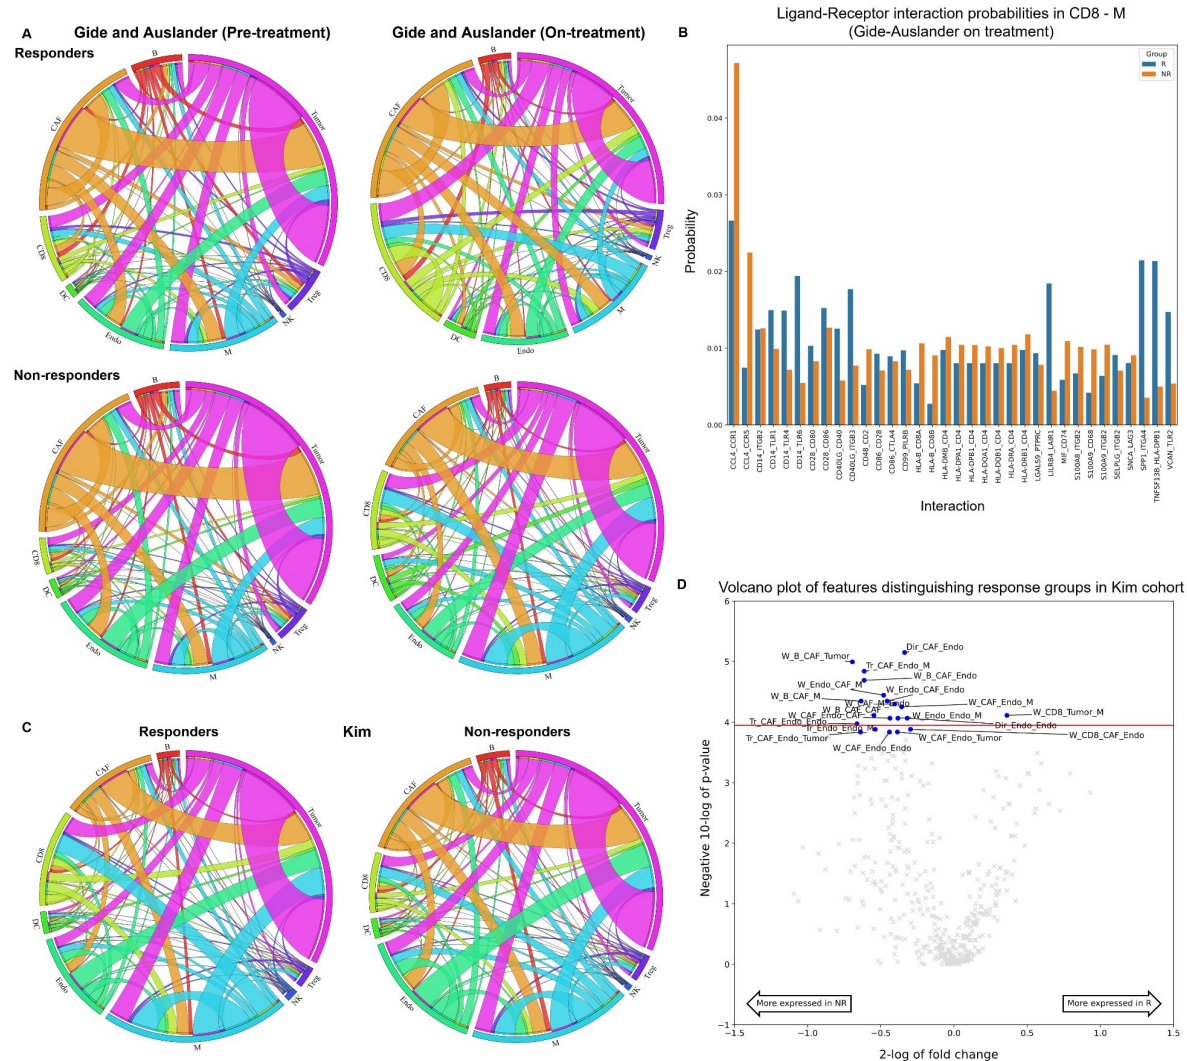

374 **Fig. 7: Comparison of responders and non-responders to immunotherapy.** (A) Circos plot of average kernel values in  
 375 responder and non-responder groups of the Gide-Auslander cohorts. The size of each ribbon indicates the fraction  
 376 of total communication each cell-type is part of. The thickness of the lines in between two cell-types indicates how  
 377 much these cell-types communicate. Circos plots were produced using the online tool “circos”<sup>50</sup>. (B) Protein  
 378 communication scores between CD8+ T-cells and macrophages in the Gide-Auslander cohorts on treatment. (C)  
 379 Circos plot of average kernel values in responder and non-responder groups of the Kim cohort. (D) Comparison of  
 380 responders and non-responders in the Kim cohort

381  
 382 These results are in agreement with the increased CD8+ T cell communication in the IE  
 383 subtype (associated with ICB response<sup>31</sup>) with respect to the F subtype (associated with lack  
 384 of ICB response<sup>31</sup>) that we previously observed in the pan-cancer analysis (**Fig. 5**). For ICB  
 385 to be effective, T-cell activation is important<sup>31,48</sup>. This means that T-cells communicate more  
 386 with tumor cells (for direct killing and additive cytotoxicity<sup>49</sup>) or with each other (for self-  
 387 activation), explaining why these two fingerprints increased in responders upon ICBs  
 388 treatment.

389 Interestingly, when we subsequently compared non-responders before and on treatment in  
 390 the same cohort, we still saw an increase in T-cell communication (the sum of all kernel values  
 391 involving T-cells is 0.8212 before treatment versus 1.7490 on treatment), but not in tumor



392 communication (5.4529 versus 5.2310). We also noted that macrophage communication to T-  
393 cells tripled (0.0924 versus 0.3398). Taken together with increased T-cell activity, this hinted  
394 at non-responders having a high activity of pro-tumor macrophages after treatment, which  
395 could not solely be explained by increased pro-tumor macrophage abundance  
396 (**Supplementary Fig. 4**). The pro-tumor macrophages possibly suppress the anti-tumor  
397 activity of CD8+ T-cells and cause resistance to ICB treatment.

398 To better understand the dual role that macrophages to CD8+ T cells communication have in  
399 responders and in non-responders we compared the ligand-receptor interactions driving this  
400 cell-cell interaction in the on-treatment samples between these two patient groups (**Fig. 7B**).  
401 Here, we observed that non-responders had a higher expression of the macrophage  
402 inflammatory protein 1 $\beta$  (CCL4), which is linked to suppression of CD8+ T-cells and  
403 recruitment of pro-tumor macrophages<sup>51</sup>. Moreover, we also saw increased activity of the  
404 S100 calcium-binding protein A8 and A9 (S100A8/-A9), which is a biomarker of tumor  
405 progression also in response to ICB therapy in melanoma patients, in agreement with their  
406 appearance in non-responders<sup>52</sup>. Additionally, non-responders showed higher expression of  
407 major histocompatibility complex class I-B (HLA-B) binding to CD8(A and B) T cell receptors,  
408 which is linked to downregulation of CD8+ T-cell activity<sup>53</sup> and T-cell exhaustion<sup>54</sup> mediated  
409 by pro-tumor macrophages. Interestingly, major histocompatibility complex class II (HLA-DM,  
410 -DP, -DQ, -DR) interaction with cluster for differentiation 4 (CD4), which is normally related to  
411 antigen presentation, is also slightly higher in non-responders. This could be linked to an  
412 aberrant expression of HLA class II molecules that have been linked in melanoma to  
413 recruitment of dampened CD8+ T-cells<sup>55</sup>. Finally, some other minor proteins that are more  
414 expressed in non-responders are also linked to pro-tumor macrophage activity (e.g.,  
415 macrophage migration inhibitory factor; MIF<sup>56</sup>). Overall, these results suggest that  
416 macrophages to CD8+ T cells regulation in non-responders is associated with pro-tumor  
417 macrophages which provide alternative ways to inhibit immune response and therefore resist  
418 anti-PD1 treatment.

419 Next, we analyzed responder and non-responder gastric cancer patients treated with anti-PD1  
420 (Kim cohort, n = 45; **Fig. 7C**)<sup>47</sup>. We observed that features involving CAFs and endothelial  
421 cells were indicative of non-response (e.g. *Dir\_CAF\_Endo* in **Fig. 7D**; p-value < 0.0001 and  
422 2-log fold-change -0.34) while the *W\_CD8\_Tumor\_M* feature was indicative of response (p-  
423 value < 0.0001 and fold-change 0.36). Communication of CAFs and endothelial cells could be  
424 expected for the non-response group, given their known association with angiogenesis and a  
425 pro-tumor microenvironment<sup>57</sup>. The appearance of CD8+ T-cell communication with tumor  
426 cells was in line with the general behavior for responders we observed when analyzing the  
427 melanoma cohorts.

428 Since macrophages made an appearance in both the non-responder and responder groups,  
429 we further looked at direct cell-cell communications (**Fig. 7C**). We observed that macrophages  
430 communicate more with CD8+ T-cells in the responder (kernel of 0.4483) than in the non-  
431 responder group (kernel of 0.2462). This is in agreement with previous observations that, in  
432 gastric cancer, interactions between CD8+ T-cells and macrophages create an immune  
433 inflamed TME that is associated with better prognosis and survival<sup>58</sup>. Additionally, in the non-  
434 responder group the protein interaction profile showed that the macrophages exhibited a pro-  
435 tumor phenotype (**Supplementary Fig. 5**).

436 Finally, we observed that B-cells tend to preferentially appear in features associated with non-  
437 response (**Fig. 7D**) and that they are in general more active in non-responders (sum of kernel  
438 values involving B-cells is 0.5221 in responders versus 0.7593 in non-responders; **Fig. 7C**). A  
439 possible explanation to this behavior is the formation of regulatory B-cells. This phenotype of  
440 B-cells plays a role in tumor progression and immune system suppression in gastric cancer<sup>59</sup>.  
441 To test this hypothesis, we compared the ligand-receptor interactions for B-cell to CD8+ T-cell  
442 communication between responders and non-responders (**Supplementary Fig. 6**). This  
443 showed that especially the lymphocyte-specific protein tyrosine kinase (Lck) was more active  
444 in the non-response group. This protein is known to hinder T-cell activation<sup>60</sup>, providing a  
445 pathway exploited by B-cells other than PD-L1 to allow tumor cells to evade the immune  
446 system, hinting at the regulatory B-cell phenotype<sup>59</sup>.

## 447 Discussion

448 RaCInG is a new computational tool to construct patient-specific cell-cell interaction models  
449 based predominantly on bulk RNA-seq. This methodology leverages techniques from the  
450 mathematical field of random graphs and provides a way to build cell-cell interaction networks  
451 at the level of individual cells. Moreover, since the networks are built based on well-studied<sup>17</sup>  
452 models, theoretical guarantees can be derived about the patient's networks. Our method  
453 extends previous research efforts since it captures the unknown features in a patient's TME  
454 through stochasticity. It assumes the input data as given but does not infer a deterministic  
455 network based on this data. Rather, it builds a network ensemble of admissible networks which  
456 adhere to the provided input data and searches for features that remain (statistically)  
457 consistent over the entire ensemble. Moreover, RaCInG allows us to go beyond  
458 communication of individual cell-types: it can consider features for which more than two cell-  
459 types come into play (wedges and triangles). Finally, RaCInG removes the bias introduced  
460 through cell-type quantification and places all network features on the same footing by

461 considering the fold-change between feature values in two network settings: one with “normal”  
462 input data, and one with input data that only considers cell-type quantification.

463 We have applied RaCInG to study the role of cell-cell interactions in the TME. We have shown  
464 that RaCInG is able to extract network fingerprints for individual patient’s TME that correlate  
465 well with immune response, TME subtypes and response to ICB therapy. Intracellular  
466 communication regulates cellular phenotypes possibly explaining the dual role that certain  
467 cell-types can have in different contexts<sup>27,61</sup>. For example, using RaCInG in a pan-cancer  
468 analysis of six cancer types from the TCGA, we have observed that macrophages can be  
469 associated with an anti-tumor or a pro-tumor TME subtype depending if they preferably  
470 interact with CD8+ T-cells or with CAFs, respectively. In agreement with this observation,  
471 macrophages interaction with CD8+ T-cells is also positively associated with better response  
472 to ICB therapy in gastric cancer.

473 RaCInG allows us to dive deeper into which ligand-receptor pairs characterize specific cell-  
474 cell interactions, providing a better understanding of their potential role in regulating immune  
475 cell phenotypes. In this way we can link network fingerprints with their corresponding  
476 proteomic landscape. For example, we used this approach to look into ligand-receptor  
477 interactions driving communication between macrophages and CD8+ T cells in melanoma  
478 patients treated with ICB therapy. In this way we identified a potential role of pro-tumor  
479 macrophages in downregulating immune response in non-responders, which could justify their  
480 lack of response to anti-PD1 therapy. If this is the case, combining anti-PD1 therapy with  
481 macrophage-targeting treatment could provide a better treatment strategy.

482 It is worth noticing that more “complex” features (i.e., wedges and triangles, involving triplets  
483 of cell-types) are often better associated with tumor characterization than the “simpler” direct  
484 communication features between pairs of cell-types. Although cellular communications  
485 involving more than two cell-types are more difficult to interpret, this observation highlights the  
486 importance of studying cell-cell communication networks rather than focusing only on direct  
487 cell-cell interactions pairs.

488 In the TCGA case study we are not using the model to its full potential: we are extracting  
489 undirected features from the graph while we are constructing models that consider  
490 directionality. This choice was made based on the observation that directed features involving  
491 the same cell-types often had similar relevance, e.g., in the pan-cancer analysis comparing  
492 different TME subtypes. A possible explanation for this in the context of the TME, is the  
493 observation that ligand-receptor interactions are not a one-way street. When a ligand-receptor  
494 interaction occurs, often this elicits a reaction in both the ligand cell-type, and the receptor cell-  
495 type<sup>10</sup>, partially masking the directionality of the interaction.

496 RaCInG does not perform well with very rare cell-types like the NK cells in our case study,  
497 possibly because they cannot be accurately estimated with current deconvolution methods. In  
498 practice, this meant that NK cells might not appear in any of the networks for some patients,  
499 rendering features including NK cells unstable. To overcome this issue, we did not include NK  
500 cells in our statistical analysis for the features computed with the monte-carlo method.

501 For direct communication we overcame this issue by resorting to the kernel method. Kernels  
502 are derived from random graph theory and capture the limiting behavior of the networks when  
503 the amount of cells tends to infinity. Since RaCInG's kernel is determined by a relatively simple  
504 equation, this allows us to derive feature values much quicker and more precisely than in the  
505 monte-carlo method. However, we can only apply the kernel method in cases where the exact  
506 feature values are theoretically known. When no theoretical results exist, one needs to rely on  
507 the monte-carlo method.

508 Although we have shown the potential of RaCInG when applied to some case studies, we  
509 provide RaCInG as a flexible and modular tool that can be adapted to different research needs.  
510 For example, we currently implemented the extraction of three types of network fingerprints  
511 (direct communication features, wedges, and triangles), however other graph fingerprints (e.g,  
512 the size of the giant strongly connected component, or more intricate graphlets like stars) can  
513 be integrated in the pipeline. RaCInG can also be adapted to using different input data, for  
514 example when cell quantification in a sample is directly measured (e.g., by flow cytometry).  
515 This information can be provided as input to RaCInG without having to rely on deconvolution  
516 methods. Similarly, when more context specific information on the expression of ligands and  
517 receptors are available for individual cell-types, this information can be directly used to  
518 compute the LR distribution matrix. Random graph methods could be expanded in the future  
519 to include geometry<sup>20</sup> to leverage the increasing availability of spatial data (e.g. spatial  
520 transcriptomics<sup>62</sup> or immunohistochemistry<sup>63</sup>).

521 To conclude, we envision that RaCInG will be a useful tool to study how cell-cell  
522 communication characterizes the observed tissue phenotypes in different contexts. This can  
523 extend to the investigation of intercellular communication in different physiological (e.g. cell  
524 development<sup>64-67</sup> or tissue homeostasis<sup>68</sup>) and pathological contexts<sup>69</sup>.

## 525 **Methods**

### 526 **Cancer specific data acquisition and transformation**

527 In the context of modeling the TME, RaCInG requires different types of biological information.  
528 We first annotated which ligand-receptors are specific for the different cell-types of interest by  
529 leveraging curated literature resources<sup>23</sup> and cell-type specific RNA-seq data<sup>24</sup>. And then, we  
530 used bulk RNA-seq data to quantify cell type fractions and ligand-receptor bindings for each  
531 individual patient.

532 To better characterize the cell-cell communication network produced by RaCInG, we gathered  
533 information about the TME subtype of patients (from literature) and their anti-cancer immune  
534 response (inferred from bulk RNA-seq).

### 535 **Bulk RNA-sequencing data**

#### 536 **The Cancer Genome Atlas (TCGA)**

537 Gene expression data for six solid tumors: BLCA, CRC, NSCLC, KIRC, SKCM and STAD  
538 were downloaded via the Firehose tool from the BROAD Institute  
539 (<https://gdac.broadinstitute.org>), released January 28, 2016. We selected primary tumor or  
540 metastatic (only in the case of melanoma) samples, resulting in a total of 3213 patients.

541 We extracted the gene expression data from “illuminahisecq\_rnaseqv2-RSEM\_genes” files.  
542 From these data, we used “raw\_count” values as counts, and we calculated transcripts per  
543 million (TPM) from “scaled\_estimate” values multiplied by 1,000,000. We first removed those  
544 genes with a non-valid HGNC symbol and then we averaged the expression of those genes  
545 with identical HGNC symbols.

#### 546 **Datasets of patients treated with immunotherapy**

547 Gene expression data for melanoma (Gide<sup>45</sup> and Auslander<sup>46</sup> cohort) and gastric cancer  
548 (Kim<sup>47</sup> cohort) was available from published datasets of patients treated with anti-PD1 therapy,  
549 which also include information about patients’ best overall response (**Supplementary Table**  
550 **3** for more details and accession numbers).

551 For each cohort, we downloaded FASTQ files of RNA-seq reads from the Sequence Read  
552 Archive (SRA, <https://www.ncbi.nlm.nih.gov/sra/>). We used quantIseq to process the data<sup>70</sup>.  
553 First, Trimmomatic<sup>71</sup> is used to remove adapter sequences and read ends with Phred quality  
554 scores lower than 20, discard reads shorter than 36 bp, and trim long reads to a maximum  
555 length of 50 bp (quantIseq preprocessing module). Then, Kallisto<sup>72</sup> is applied on the pre-  
556 processed RNA-seq reads to generate gene counts and TPM using the “hg19\_M\_rCRS”  
557 human reference (quantIseq gene-expression quantification module).

## 558 TME subtypes

559 We used a previously defined classification of the TME to assign patients into different  
560 subtypes: Immune-Enriched Fibrotic (IE/F), Immune-Enriched Non-Fibrotic, Fibrotic (F) and  
561 Desert (D)<sup>31</sup>. The TME subtype associated with each patient was provided by the original work  
562 for TCGA datasets as well as for Gide-Auslander cohorts.

## 563 Transformation of RNA-seq into RaCInG input data

### 564 Quantification of individual cell-type abundance

565 We used *in silico* deconvolution<sup>73</sup> to estimate cell fractions from bulk-tumor RNA-seq data. In  
566 order to obtain robust cell fraction estimates, we used a consensus approach based on six  
567 deconvolution methods accessible through the *immunedecon*<sup>74</sup> R package v2.1.0:  
568 *quanTIseq*<sup>70</sup>, *EPIC*<sup>75</sup>, *ConsensusTME*<sup>76</sup>, *xCell*<sup>77</sup>, *TIMER*<sup>78</sup>, and *MCP-counter*<sup>79</sup>. *quanTIseq* and  
569 *EPIC* were selected for their capability of estimating cell fractions referred to the overall  
570 composition of the tumor sample (not possible for the other methods), whereas the remaining  
571 methods were used to confirm and/or refine the estimates as explained in the following.  
572 *quanTIseq* was used to estimate cell fractions for CD8+ T cells, B cells, Tregs, M1 and M2  
573 macrophages, which showed high correlation with the other deconvolution methods  
574 (**Supplementary Fig. 7**). Since M1 and M2 signatures do not recapitulate their diversity in the  
575 tumor and given the limited availability of methods to derive a consensus we decided to sum  
576 them and consider macrophages as a unique cell type. *EPIC* was used to estimate CAFs  
577 (absent in *quanTIseq* signature), NK cells (low consensus agreement for *quanTIseq*), and  
578 tumor cells (high agreement with *quanTIseq* estimates, but more accurate as they do not  
579 include endothelial and epithelial cells), and normal cells (endothelial cells). Treg and NK cell  
580 fractions that were given a null score by *xCell*, were set to zero. Given the low agreement of  
581 *EPIC* and *quanTIseq* on DC fractions compared to other methods, we used a three-step  
582 consensus approach: 1) we scaled in the 0-1 range DC scores obtained with *xCell*, *MCP-*  
583 *counter*, and *TIMER*; 2) we took their median; and 3) we rescale it to span the range of values  
584 covered by *quanTIseq*, after correction of absent cells according to *xCell*. Finally, cell fractions  
585 in each sample were rescaled to sum up to 1.

### 586 Cell-type compatibility of ligands and receptors

587 Using the *LIANA*<sup>80</sup> R package v0.1.10 and the *OmnipathR* R package v3.7.0, we retrieved a  
588 customized set of intercellular interactions from *Omnipath*<sup>23</sup>, which consisted of interactions  
589 curated in the context of cell-cell communication available from six resources: *CellphoneDB*<sup>81</sup>,  
590 *CellChat*<sup>82</sup>, *ICELNET*<sup>83</sup>, *connectomeDB2020*<sup>84</sup>, *CellTalkDB*<sup>85</sup> and *Cellinker*<sup>86</sup>. Then, we  
591 filtered for direct cell-cell communication interactions by excluding proteins related to the

592 extracellular matrix. Additionally, protein complexes were splitted into individual subunits. This  
593 resulted in a total of 3081 LR interactions.

594 From the database of Ramilowski et al.<sup>24</sup>, the gene expression of 144 human cell-types based  
595 on cap analysis of gene expression (CAGE) from the FANTOM5 project is available. We kept  
596 only the cell-types for which we could quantify their abundance based on deconvolution  
597 methods. The agreement was not perfect and certain “deconvolution” cell-types matched more  
598 than one “ramilowski” cell type, thus we aggregated them by averaging their expression  
599 because they showed high correlation between the expression of their ligands and receptors.  
600 We additionally included a pan-cancer cell type derived by using data from the Cancer Cell  
601 Line Encyclopedia (CCLE)<sup>87</sup> as described in our previous study<sup>26</sup>. Based on gene expression  
602 data of 583 cell lines (from 18 solid cancer types), the median expression of each gene was  
603 considered as the gene expression of the pan-cancer cell type.

604 Ligands and receptors were first selected based on their expression ( $\geq 10$  TPM threshold) in  
605 at least one of the 10 cell-types considered, and then based on the presence of the  
606 corresponding ligand or receptor pair in the network. The 10 TPM threshold was initially used  
607 in the Ramilowski paper for the CAGE data, and it was based on known expression data from  
608 B-cells. We have previously described that this cutoff value was suitable for the CCLE RNA-  
609 seq data<sup>26</sup>.

610 The compatibility of ligand and receptors was specific for each cell type, comprising a total of  
611 971 LR pairs.

#### 612 Quantification of ligand-receptor pair activation

613 Patient-specific LR pair weights were defined as the minimum of the  $\log_2(\text{TPM}+1)$  expression  
614 of the ligand and the receptor, hypothesizing that the expression of the gene at the lower level  
615 limits the LR binding affinity.

#### 616 Computation of immune response score

617 We used our "easier" R/Bioconductor package<sup>26,88</sup> to compute a score of immune response  
618 based on the median of the z-score values of 10 published transcriptomics signatures of the  
619 immune response. All these signatures were calculated according to the methodology  
620 reported by the original studies.

#### 621 Random graph generation (monte-carlo simulation)

622 The process in which RaCInG created graphs and extracted features is independent of the  
623 application domain. Four different facets are important in this pipeline:

624 1. Generation of nodes and arcs based on input data.

625 2. Assignment of arcs to node-pairs.

626 3. Feature extraction.

627 4. Normalization.

## 628 Generating nodes and arcs

629 An overview of the variables and distributions used for the random graph model is presented  
630 in **Table 2**. These variables correspond to (elements of) the input matrices in **Fig. 1A**.

631 **Table 2.** Symbols used to describe the random graph model.

| Symbol    | Type                     | Interpretation                                                                                                                                        | Notes                                                                                      |
|-----------|--------------------------|-------------------------------------------------------------------------------------------------------------------------------------------------------|--------------------------------------------------------------------------------------------|
| $N$       | Number                   | Number of cells in one network instance.                                                                                                              |                                                                                            |
| $\lambda$ | Number                   | Average number of interactions per cell.                                                                                                              |                                                                                            |
| $Q$       | Probability distribution | Probability of cells having a given type, i.e. the cell-type quantification in the C-matrix of <b>Fig. 1A</b> .                                       | $q_k$ is the probability of one cell having type $k$ .                                     |
| $P$       | Probability distribution | Probability of an interaction consisting of a given ligand and receptor, i.e. the ligand-receptor quantification in the LR-matrix of <b>Fig. 1A</b> . | $p_{ij}$ is the probability of one interaction consisting of ligand $i$ and receptor $j$ . |
| $L$       | Matrix                   | Compatibility of specific cell-types with specific ligands.                                                                                           | $L(k, i)$ is the indicator that cell-type $k$ can secrete ligand $i$ .                     |
| $R$       | Matrix                   | Compatibility of specific cell-types with specific receptors.                                                                                         | $R(k, i)$ is the indicator that cell-type $k$ can secrete receptor $j$ .                   |

632 To create the nodes for one instance of the network, RaCInG creates a list of length  $N$  with  
633 independent realizations from  $Q$ . In this list entry  $l$  corresponds to the cell-type of node  $l$ .  
634 Similarly, to create the (unpaired) arcs for one instance of the network, RaCInG creates a list  
635 of length  $\lambda N$  (rounded down) with independent realizations from  $P$ . Here, entry  $l$  of the list  
636 corresponds to a tuple that encodes both the ligand and the receptor of interaction  $l$ .  
637

## 638 Pairing nodes and arcs

639 To pair nodes and arcs, RaCInG iterates over the list of interactions in the following way:

640 1. It reads the type of the interaction's ligand. Suppose it had type  $i$ .

641 2. It highlights all nodes that have a type  $k$  such that  $L(k, i) = 1$ .

642 3. It chooses one of these nodes uniformly at random with replacement.

643 4. It reads the type of the interaction's receptor. Suppose it had type  $j$ .



- 644 5. It highlights all nodes that have a type  $k$  such that  $R(k, j) = 1$ .  
645 6. Independently of the previous choice, it chooses one of these nodes uniformly at  
646 random with replacement.

647 After this procedure is executed for all interaction pairs, we obtain a complete network. To  
648 generate an ensemble of networks for one patient, RaCInG repeats the node/interaction  
649 procedure and pairing procedure a predetermined number of runs. Each run is generated  
650 independently from the previous runs.

## 651 Feature extraction

### 652 Wedges and triangles (monte-carlo method)

653 For wedges and triangles the feature extraction is based on a network's adjacency matrix  $A$ .  
654 In this matrix the entry  $a_{ij}$  indicates the number of arcs from node  $i$  to node  $j$ . For each  
655 network, RaCInG outputs a list of paired arcs, which is transformed into an adjacency matrix.  
656 Features are then extracted from this matrix.

657 For example, for the wedges this is done by iterating over all rows in the matrix, recording the  
658 neighbors a given vertex connects to (together with the multiplicity of the connection) and then  
659 recording these neighbors' subsequent neighbors. This yields a list of triplets of vertices that  
660 form wedges. The types of these wedges can subsequently be extracted and tallied for each  
661 combination of cell-types. Triangles counts are computed in a similar way.

662 Once this procedure is executed for each individual network in the ensemble, the average is  
663 computed over all the tallies. This provides the value of one feature for a given patient. The  
664 standard deviation is also recorded as a check to ensure the average expression value  
665 concentrates around the actual measured feature values from each network.

### 666 Direct communication (kernel method)

667 For direct communication values an asymptotic count is implemented based on the law of total  
668 probability and the law of large numbers<sup>89</sup>. To derive this count, we first note that the expected  
669 fraction of cells a fixed ligand  $i$  can connect to, is given by  $\sum_s q_s L(s, i)$ . Similarly, the expected  
670 fraction of cells a fixed receptor  $j$  can connect to is given by  $\sum_r q_r R(r, j)$ . Together,  
671  $\sum_{s,r} q_s L(s, i) q_r R(r, j)$  is the fraction of cells an LR-pair  $(i, j)$  can connect to.

672 An arc from cell-type  $k$  to  $l$  is only formed if cells of these types are chosen in the arc  
673 assignment step. Since the fraction of cells with these types is given by  $q_k$  and  $q_l$ , respectively,

674 and since only one pair of (admissible) cells is chosen uniformly at random, the probability that  
 675 LR-pair  $(i, j)$  formed an arc from cell-type  $k$  to  $l$  is given by

$$676 \quad \frac{q_k q_l L(k, i)R(l, j)}{\sum_{s,r} q_s L(s, i)q_r R(r, j)}$$

677 Here, multiplication with  $L(k, i)R(l, j)$  is needed since the probability can only be nonzero when  
 678 the LR-pair is allowed to connect cells with type  $k$  and  $l$ . This probability is built on the  
 679 assumption that LR-pair  $(i, j)$  is chosen to connect two cells. In reality, RaCInG can generate  
 680 all possible LR-pairs to connect cells, hence it is not known a-priori. Thus, to find the a-priori  
 681 probability of an arc being formed from cell-type  $k$  to  $l$ , a weighted sum needs to be taken over  
 682 the above probability for all possible LR-interactions. The weight for each probability is given  
 683 by the LR-pair's quantification  $p_{ij}$ . Mathematically, this means the law of total probability is  
 684 applied, and it yielded the following a-priori probability  $\pi_{kl}$  of generating a connection from  
 685 cell-type  $k$  to  $l$ :

$$686 \quad \pi_{kl} = q_k q_l \sum_{ij} p_{ij} \cdot \frac{L(k, i)R(l, j)}{\sum_{s,r} q_s L(s, i)q_r R(r, j)}$$

687 With this probability  $\pi_{kl}$ , an asymptotic count can be computed. If  $N_{kl}$  denotes the total number  
 688 of arcs from cells of type  $k$  to  $l$ , then it is known due to independence of the various arc  
 689 placements in RaCInG's network generation algorithm that  $N_{kl}$  is a binomial distribution with  
 690  $\lambda N$  trials and success probability  $\pi_{kl}$ . From this fact, together with the (weak) law of large  
 691 numbers, we subsequently conclude that

$$692 \quad \frac{N_{kl}}{\lambda n} \rightarrow \pi_{kl}$$

693 in probability. These were the theoretical feature values used for direct communication.  
 694 Moreover, the expression

$$695 \quad \kappa(k, l) = \sum_{ij} p_{ij} \cdot \frac{L(k, i)R(l, j)}{\sum_{s,r} q_s L(s, i)q_r R(r, j)}$$

696 within the expression of  $\pi_{kl}$  is called the kernel of RaCInG. It could be interpreted as the direct  
 697 communication feature with the explicit cell-type quantification bias (the product  $q_k q_l$ )  
 698 removed.

699 From directed to undirected features

700 Features from both the monte-carlo and kernel method are directed. For the TCGA case study  
701 it was decided to use undirected features instead of directed features. To compute these from  
702 the directed features, all directed counts with the same cell-types were accumulated. For  
703 example, in the case of direct communication the undirected feature Dir\_A\_B was obtained  
704 by computing  $\pi_{AB} + \pi_{BA}$ . A visual overview of all directed features to accumulate to get the  
705 corresponding undirected feature is presented in **Supplementary Fig. 8**.

706 Normalization

707 To normalize, the pipelines for network generation and feature extraction were executed  
708 again, but this time in a setting where the distribution  $P$  was made uniform over its support.  
709 Hence, if one sets

$$710 \quad c = \sum_{ij} 1\{p_{ij} > 0\},$$

711 where  $1\{\cdot\}$  indicates the indicator function, then in the uniform runs a new probability  
712 distribution  $\tilde{P}$  was used for the ligand-receptor interactions. In this distribution, the probability  
713 of an interaction between ligand  $i$  and receptor  $j$  occurring was given by

$$714 \quad \tilde{p}_{ij} = (1/c)1\{p_{ij} > 0\}.$$

715 All other parameters were kept the same as in the previous “standard” runs. Finally, if  $f_{st}$  is  
716 the (average) feature value in the “standard” run and  $f_{unif}$  is the same (average) feature value  
717 in the uniform run, then the normalized feature value was given by the fold change between  
718 these two runs, i.e.

$$719 \quad f_{norm} = \frac{f_{st}}{f_{unif}}.$$

720 One can identify  $f_{norm}$  as the number of times a feature would appear more often in the  
721 networks generated with the actual input data compared to the networks generated with input  
722 data that disregarded the LR-quantification. A big advantage of this normalization procedure  
723 is its ability to place all feature values on the same footing regardless of the method they were  
724 computed by. No matter if  $f_{norm}$  is computed through the monte-carlo method or the kernel  
725 method, its interpretation and value range stay the same.

## 726 Analyzing the extracted features

### 727 Statistical analysis methods

728 We used the Spearman rho correlation coefficient to assess correlations between two  
729 samples. This metric was applied, since limited prior knowledge was available on the joint  
730 distribution of the two samples. Moreover, since some features extracted from the networks  
731 (especially ones with small cell-type or ligand-receptor quantifications) were prone to  
732 producing outliers, a metric is used that is more robust against these outliers. To calculate it  
733 the `scipy.stats.spearmanr` function in Python was used based on the 1.9.2 version of the Scipy  
734 package.

735 The two-sided Wilcoxon rank sum test at significance level  $\alpha = 0.05$  was applied to test for  
736 differences between two groups of patients in the case studies. It was chosen for similar  
737 considerations as the spearman rho metric. To apply the test the function `scipy.stats.ranksums`  
738 from the 1.9.2 version of the Scipy package in Python was used. If a statistical difference  
739 between two groups was observed for a feature, the fold-change between the average feature  
740 values of the groups was used to infer how much the empirical distributions of the two groups  
741 overlap.

742 To correct for multiple hypothesis testing we applied Bonferroni correction by lowering the  
743 significance level for individual tests. Specifically, when we tested at significance level  $\alpha$  for  $n$   
744 features, the null-hypothesis was rejected whenever the test's p-value dropped below  $\alpha/n$ .

### 745 Bayesian computation of ligand-receptor probability for given cell-types

746 To compute the conditional probability that a certain LR-pair caused the formation of an  
747 interaction, given the interaction is between two given cell-types we only used the LR-  
748 distribution  $P$  and the compatibility matrices  $L$  and  $R$ . The unconditional probability of LR-pair  
749  $(i, j)$  appearing is given by  $p_{ij}$ . To infer its contribution to a direct interaction between cell-type  
750  $k$  and  $l$ , one first needs to know whether it connects these cell-types. The indicator of this  
751 event is given by  $L(k, i)R(l, j)$ .

752 Now, since all interactions were sampled and paired independently, and uniformly at random,  
753 the conditional probability of LR-pair  $(i, j)$  connecting cell-types  $k$  and  $l$  was given by the LR-  
754 pair's relative (probabilistic) weight when compared to the weights of all LR-pairs that can  
755 connect cell-types  $k$  and  $l$ . Thus, the conditional probability that LR-pair  $(i, j)$  formed a  
756 connection, given that it is a connection between cell-types  $k$  and  $l$ , is given by

757 
$$p_{ij}^{(kl)} = \frac{p_{ij}L(k, i)R(l, j)}{\sum_{ab} p_{ab}L(k, a)R(l, b)}$$

758 To compute the LR-probability for given cell-types over an entire group, these probabilities  
759 were taken for all patients in the group and averaged. The largest of the resulting averages  
760 were depicted in the LR-interaction bar charts.

## 761 Data and code availability

762 All the datasets used are publicly available (**Supplementary Table 3**).

763 The code used for generating the random graphs is available at  
764 <https://github.com/SysBioOncology/RaCInG>. A step-by-step reproducible report (i.e.,  
765 RMarkdown notebook) on how this knowledge can be extracted is made available in github.  
766 A demo that showcases RaCInG's functionalities is also made available in github.

## 767 Acknowledgements

768 The authors acknowledge the support of the Immunoengineering program of the Institute for  
769 Complex Molecular System. We would like to thank Livy Nijhuis for testing the code.

## 770 Author contribution

771 PvdH and FE designed the research. MvS, OLS, PvdH and FE discussed how to use random  
772 graph models in biological context. MvS defined and implemented the mathematical  
773 formulation of the model under the supervision of PvdH. OLS analyzed the data used for the  
774 case study and transformed it into input matrices for the mathematical model under the  
775 supervision of FE. FF defined the approach for cell-type quantification using an ensemble of  
776 deconvolution algorithms. MvS, OLS, PvdH and FE contributed to the interpretation of the  
777 results. MvS and FE co-wrote the manuscript with input from all authors. All authors discussed  
778 the results and commented on the manuscript.

## 779 Competing interests

780 The authors declare no competing interests.

## 781 References

- 782 1. Waldman, A. D., Fritz, J. M. & Lenardo, M. J. A guide to cancer immunotherapy: from T  
783 cell basic science to clinical practice. *Nat. Rev. Immunol.* **20**, 651–668 (2020).
- 784 2. Han, Y., Liu, D. & Li, L. PD-1/PD-L1 pathway: current researches in cancer. *Am. J. Cancer*  
785 *Res.* **10**, 727–742 (2020).
- 786 3. Lapuente-Santana, Ó. & Eduati, F. Toward Systems Biomarkers of Response to Immune  
787 Checkpoint Blockers. *Front. Oncol.* **10**, 1027 (2020).
- 788 4. Rojas-Domínguez, A., Arroyo-Duarte, R., Rincón-Vieyra, F. & Alvarado-Mentado, M.  
789 Modeling cancer immunoediting in tumor microenvironment with system characterization  
790 through the ising-model Hamiltonian. *BMC Bioinformatics* **23**, 200 (2022).
- 791 5. Josephs, S. F. *et al.* Unleashing endogenous TNF-alpha as a cancer immunotherapeutic.  
792 *J. Transl. Med.* **16**, 242 (2018).
- 793 6. Armingol, E., Officer, A., Harismendy, O. & Lewis, N. E. Deciphering cell-cell interactions  
794 and communication from gene expression. *Nat. Rev. Genet.* **22**, 71–88 (2021).
- 795 7. Wang, K. *et al.* Deconvolving Clinically Relevant Cellular Immune Cross-talk from Bulk  
796 Gene Expression Using CODEFACS and LIRICS Stratifies Patients with Melanoma to  
797 Anti-PD-1 Therapy. *Cancer Discov.* **12**, 1088–1105 (2022).
- 798 8. Choi, H. *et al.* Transcriptome analysis of individual stromal cell populations identifies  
799 stroma-tumor crosstalk in mouse lung cancer model. *Cell Rep.* **10**, 1187–1201 (2015).
- 800 9. Browaeys, R., Saelens, W. & Saeys, Y. NicheNet: modeling intercellular communication  
801 by linking ligands to target genes. *Nat. Methods* **17**, 159–162 (2020).
- 802 10. Gibbs, D. L., Aguilar, B., Thorsson, V., Ratushny, A. V. & Shmulevich, I. Patient-Specific  
803 Cell Communication Networks Associate With Disease Progression in Cancer. *Front.*  
804 *Genet.* **12**, 667382 (2021).
- 805 11. Wang, S., Karikomi, M., MacLean, A. L. & Nie, Q. Cell lineage and communication  
806 network inference via optimization for single-cell transcriptomics. *Nucleic Acids Res.* **47**,  
807 e66 (2019).
- 808 12. Cang, Z. & Nie, Q. Inferring spatial and signaling relationships between cells from single  
809 cell transcriptomic data. *Nat. Commun.* **11**, 2084 (2020).
- 810 13. Yeung, T.-L. *et al.* Systematic Identification of Druggable Epithelial-Stromal Crosstalk  
811 Signaling Networks in Ovarian Cancer. *J. Natl. Cancer Inst.* **111**, 272–282 (2019).
- 812 14. Kharchenko, P. V. The triumphs and limitations of computational methods for scRNA-seq.  
813 *Nat. Methods* **18**, 723–732 (2021).
- 814 15. van der Hofstad, R. *Random Graphs and Complex Networks.* (Cambridge University  
815 Press, 2016).
- 816 16. Stark, R., Grzelak, M. & Hadfield, J. RNA sequencing: the teenage years. *Nat. Rev.*  
817 *Genet.* **20**, 631–656 (2019).
- 818 17. Cao, J. & Olvera-Cravioto, M. Connectivity of a general class of inhomogeneous random  
819 digraphs. *Random Struct. Algorithms* **56**, 722–774 (2020).
- 820 18. Bollobás, B., Janson, S. & Riordan, O. The Phase Transition in Inhomogeneous Random  
821 Graphs. *Random Struct. Algorithms* **31**, 3–122 (2007).
- 822 19. Mariana, C. J. O.-C. On a general class of inhomogeneous random digraphs. *Random*  
823 *Struct. Algorithms* **10**, 1187–1201 (2020).
- 824 20. Bringmann, K., Keusch, R. & Lengler, J. Geometric inhomogeneous random graphs.  
825 *Theor. Comput. Sci.* **760**, 35–54 (2019).
- 826 21. Cancer Genome Atlas Research Network *et al.* The Cancer Genome Atlas Pan-Cancer

- 827 analysis project. *Nat. Genet.* **45**, 1113–1120 (2013).
- 828 22. Sturm, G., Finotello, F. & List, M. Immunedeconv: An R Package for Unified Access to  
829 Computational Methods for Estimating Immune Cell Fractions from Bulk RNA-  
830 Sequencing Data. *Methods Mol. Biol.* **2120**, 223–232 (2020).
- 831 23. Türei, D. *et al.* Integrated intra- and intercellular signaling knowledge for multicellular  
832 omics analysis. *Mol. Syst. Biol.* **17**, e9923 (2021).
- 833 24. Ramilowski, J. A. *et al.* A draft network of ligand-receptor-mediated multicellular signalling  
834 in human. *Nat. Commun.* **6**, 7866 (2015).
- 835 25. Pitt, J. M. *et al.* Targeting the tumor microenvironment: removing obstruction to anticancer  
836 immune responses and immunotherapy. *Ann. Oncol.* **27**, 1482–1492 (2016).
- 837 26. Lapuente-Santana, Ó., van Genderen, M., Hilbers, P. A. J., Finotello, F. & Eduati, F.  
838 Interpretable systems biomarkers predict response to immune-checkpoint inhibitors.  
839 *Patterns (N Y)* **2**, 100293 (2021).
- 840 27. Fridman, W. H., Pagès, F., Sautès-Fridman, C. & Galon, J. The immune contexture in  
841 human tumours: impact on clinical outcome. *Nat. Rev. Cancer* **12**, 298–306 (2012).
- 842 28. Cabrita, R. *et al.* Tertiary lymphoid structures improve immunotherapy and survival in  
843 melanoma. *Nature* **577**, 561–565 (2020).
- 844 29. Dadabayev, A. R. *et al.* Dendritic cells in colorectal cancer correlate with other tumor-  
845 infiltrating immune cells. *Cancer Immunol. Immunother.* **53**, 978–986 (2004).
- 846 30. Anderson, N. M. & Simon, M. C. The tumor microenvironment. *Curr. Biol.* **30**, R921–R925  
847 (2020).
- 848 31. Bagaev, A. *et al.* Conserved pan-cancer microenvironment subtypes predict response to  
849 immunotherapy. *Cancer Cell* **39**, 845–865.e7 (2021).
- 850 32. Boutilier, A. J. & ElSawa, S. F. Macrophage Polarization States in the Tumor  
851 Microenvironment. *Int. J. Mol. Sci.* **22**, (2021).
- 852 33. Chiarugi, P. Cancer-associated fibroblasts and macrophages: Friendly conspirators for  
853 malignancy. *Oncoimmunology* **2**, e25563 (2013).
- 854 34. Di Somma, S., Napolitano, F., Portella, G. & Malfitano, A. M. Cross Talk of Macrophages  
855 with Tumor Microenvironment Cells and Modulation of Macrophages in Cancer by  
856 Virotherapy. *Biomedicines* **9**, (2021).
- 857 35. Paluskiewicz, C. M. *et al.* T Regulatory Cells and Priming the Suppressive Tumor  
858 Microenvironment. *Front. Immunol.* **10**, 2453 (2019).
- 859 36. Fremd, C., Schuetz, F., Sohn, C., Beckhove, P. & Domschke, C. B cell-regulated immune  
860 responses in tumor models and cancer patients. *Oncoimmunology* **2**, e25443 (2013).
- 861 37. Oliveira, G. *et al.* Landscape of helper and regulatory antitumor CD4+ T cells in  
862 melanoma. *Nature* **605**, 532–538 (2022).
- 863 38. Wu, X. *et al.* Granzyme family acts as a predict biomarker in cutaneous melanoma and  
864 indicates more benefit from anti-PD-1 immunotherapy. *Int. J. Med. Sci.* **18**, 1657–1669  
865 (2021).
- 866 39. Gao, Y. *et al.* Heterogeneity induced GZMA-F2R communication inefficient impairs  
867 antitumor immunotherapy of PD-1 mAb through JAK2/STAT1 signal suppression in  
868 hepatocellular carcinoma. *Cell Death Dis.* **13**, 213 (2022).
- 869 40. Zigler, M., Kamiya, T., Brantley, E. C., Villares, G. J. & Bar-Eli, M. PAR-1 and thrombin:  
870 the ties that bind the microenvironment to melanoma metastasis. *Cancer Res.* **71**, 6561–  
871 6566 (2011).
- 872 41. Lv, Q., Xia, Q., Li, A. & Wang, Z. The Potential Role of IL1RAP on Tumor  
873 Microenvironment-Related Inflammatory Factors in Stomach Adenocarcinoma. *Technol.*  
874 *Cancer Res. Treat.* **20**, 1533033821995282 (2021).

- 875 42. Long, A. *et al.* WNT10A promotes an invasive and self-renewing phenotype in esophageal  
876 squamous cell carcinoma. *Carcinogenesis* **36**, 598–606 (2015).
- 877 43. Koushyar, S., Powell, A. G., Vincan, E. & Phesse, T. J. Targeting Wnt Signaling for the  
878 Treatment of Gastric Cancer. *Int. J. Mol. Sci.* **21**, 3927 (2020).
- 879 44. Wang, T. *et al.* SECTM1 produced by tumor cells attracts human monocytes via CD7-  
880 mediated activation of the PI3K pathway. *J. Invest. Dermatol.* **134**, 1108–1118 (2014).
- 881 45. Gide, T. N. *et al.* Distinct Immune Cell Populations Define Response to Anti-PD-1  
882 Monotherapy and Anti-PD-1/Anti-CTLA-4 Combined Therapy. *Cancer Cell* **35**, 238–  
883 255.e6 (2019).
- 884 46. Auslander, N. *et al.* Robust prediction of response to immune checkpoint blockade  
885 therapy in metastatic melanoma. *Nat. Med.* **24**, 1545–1549 (2018).
- 886 47. Kim, S., Kim, K., Choe, J., Lee, I. & Kang, J. Improved survival analysis by learning shared  
887 genomic information from pan-cancer data. *Bioinformatics* **36**, i389–i398 (2020).
- 888 48. Thor Straten, P. & Garrido, F. Targetless T cells in cancer immunotherapy. *J Immunother*  
889 *Cancer* **4**, 23 (2016).
- 890 49. Weigelin, B. *et al.* Cytotoxic T cells are able to efficiently eliminate cancer cells by additive  
891 cytotoxicity. *Nat. Commun.* **12**, 5217 (2021).
- 892 50. Krzywinski, M. *et al.* Circos: an information aesthetic for comparative genomics. *Genome*  
893 *Res.* **19**, 1639–1645 (2009).
- 894 51. Mukaida, N., Sasaki, S.-I. & Baba, T. CCL4 Signaling in the Tumor Microenvironment.  
895 *Tumor Microenvironment* 23–32 (2020).
- 896 52. Wagner, N. B. *et al.* Tumor microenvironment-derived S100A8/A9 is a novel prognostic  
897 biomarker for advanced melanoma patients and during immunotherapy with anti-PD-1  
898 antibodies. *J Immunother Cancer* **7**, 343 (2019).
- 899 53. Marchesi, M. *et al.* HLA-dependent tumour development: a role for tumour associate  
900 macrophages? *J. Transl. Med.* **11**, 247 (2013).
- 901 54. Vermare, A., Guérin, M. V., Peranzoni, E. & Bercovici, N. Dynamic CD8 T Cell  
902 Cooperation with Macrophages and Monocytes for Successful Cancer Immunotherapy.  
903 *Cancers* **14**, (2022).
- 904 55. Donia, M. *et al.* Aberrant Expression of MHC Class II in Melanoma Attracts Inflammatory  
905 Tumor-Specific CD4+ T- Cells, Which Dampen CD8+ T-cell Antitumor Reactivity. *Cancer*  
906 *Res.* **75**, 3747–3759 (2015).
- 907 56. Soumoy, L., Kindt, N., Ghanem, G., Saussez, S. & Journe, F. Role of Macrophage  
908 Migration Inhibitory Factor (MIF) in Melanoma. *Cancers* **11**, (2019).
- 909 57. Kitadai, Y. Cancer-stromal cell interaction and tumor angiogenesis in gastric cancer.  
910 *Cancer Microenviron.* **3**, 109–116 (2010).
- 911 58. Huang, Y.-K. *et al.* Macrophage spatial heterogeneity in gastric cancer defined by  
912 multiplex immunohistochemistry. *Nat. Commun.* **10**, 3928 (2019).
- 913 59. Jing, Y., Xu, F., Liang, W., Liu, J. & Zhang, L. Role of regulatory B cells in gastric cancer:  
914 Latest evidence and therapeutics strategies. *Int. Immunopharmacol.* **96**, 107581 (2021).
- 915 60. Bommhardt, U., Schraven, B. & Simeoni, L. Beyond TCR Signaling: Emerging Functions  
916 of Lck in Cancer and Immunotherapy. *Int. J. Mol. Sci.* **20**, (2019).
- 917 61. Fridman, W. H., Zitvogel, L., Sautès-Fridman, C. & Kroemer, G. The immune contexture  
918 in cancer prognosis and treatment. *Nat. Rev. Clin. Oncol.* **14**, 717–734 (2017).
- 919 62. Ståhl, P. L. *et al.* Visualization and analysis of gene expression in tissue sections by  
920 spatial transcriptomics. *Science* vol. 353 78–82 Preprint at  
921 <https://doi.org/10.1126/science.aaf2403> (2016).
- 922 63. D’Amico, F., Skarmoutsou, E. & Stivala, F. State of the art in antigen retrieval for



- 923 immunohistochemistry. *J. Immunol. Methods* **341**, 1–18 (2009).
- 924 64. Park, J.-E. *et al.* A cell atlas of human thymic development defines T cell repertoire  
925 formation. *Science* **367**, (2020).
- 926 65. Baccin, C. *et al.* Combined single-cell and spatial transcriptomics reveal the molecular,  
927 cellular and spatial bone marrow niche organization. *Nat. Cell Biol.* **22**, 38–48 (2020).
- 928 66. Sheikh, B. N. *et al.* Systematic Identification of Cell-Cell Communication Networks in the  
929 Developing Brain. *iScience* **21**, 273–287 (2019).
- 930 67. Wang, L. *et al.* Single-cell reconstruction of the adult human heart during heart failure and  
931 recovery reveals the cellular landscape underlying cardiac function. *Nat. Cell Biol.* **22**,  
932 108–119 (2020).
- 933 68. Krausgruber, T. *et al.* Structural cells are key regulators of organ-specific immune  
934 responses. *Nature* **583**, 296–302 (2020).
- 935 69. Qi, F., Qian, S., Zhang, S. & Zhang, Z. Single cell RNA sequencing of 13 human tissues  
936 identify cell types and receptors of human coronaviruses. *Biochem. Biophys. Res.*  
937 *Commun.* **526**, 135–140 (2020).
- 938 70. Finotello, F. *et al.* Molecular and pharmacological modulators of the tumor immune  
939 contexture revealed by deconvolution of RNA-seq data. *Genome Med.* **11**, 34 (2019).
- 940 71. Bolger, A. M., Lohse, M. & Usadel, B. Trimmomatic: a flexible trimmer for Illumina  
941 sequence data. *Bioinformatics* **30**, 2114–2120 (2014).
- 942 72. Bray, N. L., Pimentel, H., Melsted, P. & Pachter, L. Near-optimal probabilistic RNA-seq  
943 quantification. *Nat. Biotechnol.* **34**, 525–527 (2016).
- 944 73. Finotello, F. & Trajanoski, Z. Quantifying tumor-infiltrating immune cells from  
945 transcriptomics data. *Cancer Immunol. Immunother.* (2018) doi:10.1007/s00262-018-  
946 2150-z.
- 947 74. Sturm, G. *et al.* Comprehensive evaluation of transcriptome-based cell-type quantification  
948 methods for immuno-oncology. *Bioinformatics* **35**, i436–i445 (2019).
- 949 75. Racle, J., de Jonge, K., Baumgaertner, P., Speiser, D. E. & Gfeller, D. Simultaneous  
950 enumeration of cancer and immune cell types from bulk tumor gene expression data. *Elife*  
951 **6**, (2017).
- 952 76. Jiménez-Sánchez, A., Cast, O. & Miller, M. L. Comprehensive Benchmarking and  
953 Integration of Tumor Microenvironment Cell Estimation Methods. *Cancer Res.* **79**, 6238–  
954 6246 (2019).
- 955 77. Aran, D., Hu, Z. & Butte, A. J. xCell: digitally portraying the tissue cellular heterogeneity  
956 landscape. *Genome Biol.* **18**, 220 (2017).
- 957 78. Li, B. *et al.* Comprehensive analyses of tumor immunity: implications for cancer  
958 immunotherapy. *Genome Biol.* **17**, 174 (2016).
- 959 79. Becht, E. *et al.* Estimating the population abundance of tissue-infiltrating immune and  
960 stromal cell populations using gene expression. *Genome Biol.* **17**, 218 (2016).
- 961 80. Dimitrov, D. *et al.* Comparison of methods and resources for cell-cell communication  
962 inference from single-cell RNA-Seq data. *Nat. Commun.* **13**, 3224 (2022).
- 963 81. Efremova, M., Vento-Tormo, M., Teichmann, S. A. & Vento-Tormo, R. CellPhoneDB:  
964 inferring cell-cell communication from combined expression of multi-subunit ligand-  
965 receptor complexes. *Nat. Protoc.* **15**, 1484–1506 (2020).
- 966 82. Jin, S. *et al.* Inference and analysis of cell-cell communication using CellChat. *Nat.*  
967 *Commun.* **12**, 1088 (2021).
- 968 83. Noël, F. *et al.* Dissection of intercellular communication using the transcriptome-based  
969 framework ICELLNET. *Nat. Commun.* **12**, 1089 (2021).
- 970 84. Hou, R., Denisenko, E., Ong, H. T., Ramilowski, J. A. & Forrest, A. R. R. Predicting cell-

- 971 to-cell communication networks using NATMI. *Nat. Commun.* **11**, 5011 (2020).
- 972 85. Shao, X. *et al.* CellTalkDB: a manually curated database of ligand-receptor interactions  
973 in humans and mice. *Brief. Bioinform.* **22**, (2021).
- 974 86. Zhang, Y. *et al.* Cellinker: a platform of ligand-receptor interactions for intercellular  
975 communication analysis. *Bioinformatics* (2021) doi:10.1093/bioinformatics/btab036.
- 976 87. Barretina, J. *et al.* The Cancer Cell Line Encyclopedia enables predictive modelling of  
977 anticancer drug sensitivity. *Nature* **483**, 603–607 (2012).
- 978 88. Lapuente-Santana, Ó., Marini, F., Ustjanzew, A., Finotello, F. & Eduati, F. easier:  
979 interpretable predictions of antitumor immune response from bulk RNA-seq data. *bioRxiv*  
980 2021.11.26.470099 (2021) doi:10.1101/2021.11.26.470099.
- 981 89. Grimmett, G. & Stirzaker, D. *Probability and Random Processes*. (Oxford University  
982 Press, 2020).
